# Supplementary material for: Community-based rehabilitation programme for adolescents with mental health conditions in Israel: a qualitative study protocol
Source: PubMed Central journal article supplement — BMJ Open. 2019 Dec 18;9(12):e032809. doi: 10.1136/bmjopen-2019-032809 (PMC6937008; doi:10.1136/bmjopen-2019-032809), 2019-12-18
Supplement: bmjopen-2019-032809.draft_revisions.pdf [file bmjopen-2019-032809.draft_revisions.pdf]

# BMJ Open

BMJ Open is committed to open peer review. As part of this commitment we make the peer review history of every article we publish publicly available.

When an article is published we post the peer reviewers' comments and the authors' responses online. We also post the versions of the paper that were used during peer review. These are the versions that the peer review comments apply to.

The versions of the paper that follow are the versions that were submitted during the peer review process. They are not the versions of record or the final published versions. They should not be cited or distributed as the published version of this manuscript.

BMJ Open is an open access journal and the full, final, typeset and author-corrected version of record of the manuscript is available on our site with no access controls, subscription charges or pay-per-view fees (<http://bmjopen.bmj.com>).

If you have any questions on BMJ Open's open peer review process please email [info.bmjopen@bmj.com](mailto:info.bmjopen@bmj.com)

# BMJ Open

## **A community-based rehabilitation program for youth with mental health conditions: a qualitative study protocol**

|                               |                                                                                                                                           |
|-------------------------------|-------------------------------------------------------------------------------------------------------------------------------------------|
| Journal:                      | <i>BMJ Open</i>                                                                                                                           |
| Manuscript ID                 | bmjopen-2019-032809                                                                                                                       |
| Article Type:                 | Protocol                                                                                                                                  |
| Date Submitted by the Author: | 08-Jul-2019                                                                                                                               |
| Complete List of Authors:     | Tuaf, Hila; University of Haifa, School of Creative Arts Therapies<br>Orkibi, Hod; University of Haifa, School of Creative Arts Therapies |
| Keywords:                     | MENTAL HEALTH, QUALITATIVE RESEARCH, Child & adolescent psychiatry < PSYCHIATRY                                                           |
|                               |                                                                                                                                           |

SCHOLARONE™  
Manuscripts

1  
2  
3  
4  
5  
6 A community-based rehabilitation program for youth with mental health  
7  
8 conditions: a qualitative study protocol  
9  
10

11  
12  
13  
14 Hila Tuaf<sup>1</sup> and Hod Orkibi<sup>1</sup>  
15  
16

17  
18  
19 <sup>1</sup> School of Creative Arts Therapies, Faculty of Social Welfare and Health  
20  
21 Sciences, University of Haifa, Israel  
22  
23  
24  
25  
26  
27  
28  
29

30 Corresponding author: H. Orkibi, University of Haifa,  
31  
32 199 Aba Khoushy Av., Mount Carmel, Haifa 3498838, Israel  
33  
34

35 [horkibi@univ.haifa.ac.il](mailto:horkibi@univ.haifa.ac.il)  
36  
37

38 Cell: +972544393621  
39

40 ORCID ID: <https://orcid.org/0000-0003-1498-7953>  
41  
42  
43  
44  
45  
46  
47

48 Word count: 3475.  
49  
50  
51  
52  
53  
54  
55  
56  
57  
58  
59  
60

## Abstract

**Introduction:** In Israel, 12% of all adolescents cope with mental health conditions. Approximately 600 adolescents with mental health conditions are hospitalized each year and about 40% of them return to the hospital and are thus cut off from their daily lives and peers in the community. In contrast to adults, youth with mental health conditions in Israel are not eligible by law for rehabilitation services. Thus, the overarching goal of this qualitative study is to generate a best practice model for the implementation of community-based psychosocial rehabilitation program for this population by examining *Amitim for Youth*, the first program in Israel established in 2018 by the Israel Association of Community Centers in cooperation with the Ministry of Health, the Ministry of Education, and the Special Projects Fund of the National Insurance Institute.

**Methods and analysis:** Qualitative data will be collected through in-depth semi-structured interviews and focus groups. To identify themes and patterns in the data, the 6-stage thematic analysis approach will be used. A triangulation procedure will be conducted to strengthen the credibility of the findings collected by different methods and from different types of stakeholders in the program: the program's decision makers, team, intended beneficiaries and referring mental health professionals. To insure the trustworthiness of the findings, three strategies will be employed: memos writing, reflexive journaling, and member checking.

**Ethics and dissemination:** This study was approved by the Ethics Committee for Human Research in the Faculty of Social Welfare and Health Sciences at the University of Haifa (#455-18) and by the Chief Scientist in the Ministry of Education (#10566). All participants will sign an informed consent form and will be guaranteed confidentiality and anonymity. Data collection will be conducted in the next two years

(2019-2020). After data analysis, reports will be written, and articles will be submitted for publication.

### **Strengths and limitations of this study**

- This is a pioneering study that will examine a community-based psychosocial rehabilitation program for youth with mental health conditions in Israel.
- The findings will offer a best practice model to meet the needs and goals of all stakeholders by addressing potential barriers and facilitators for program implementation.
- The findings can contribute to policy recommendations and legislation in the field of adolescent psychiatric rehabilitation.
- Recruiting adolescents with mental health conditions can be challenging due to their condition and motivation.
- Recruiting referring mental health professionals can be challenging due to a poor continuity of care between services.

**Keywords:** adolescents, youth, psychiatric rehabilitation, mental illness, mental health, recovery, community.

## Introduction

### Youth with Mental Health Conditions (MHC)

Adolescence is characterized by physiological, psychological and social changes that are known to be associated with many challenges.<sup>1,2</sup> According to Erikson's psychosocial developmental theory,<sup>3</sup> adolescents are in the "identity versus role confusion" stage, where they search for personal identity and strive for independence through the exploration of social roles, personal values, beliefs and goals while distancing themselves from their parents. For adolescents with MHC (i.e., who cope with a psychiatric diagnosis) this developmental task is even more complex and may lead to a lack of identity formation or a negative identity.<sup>2</sup> Adolescents with MHC may also have to deal with maladaptive thoughts, dysregulated emotions and behaviors which may impact their interaction with peers and family members, academic performance, and in severe cases may involve loss of contact with reality.<sup>4</sup> Therefore, it is important to differentiate between adolescents who are coping with age-appropriate challenges and adolescents who are coping with MHC.

Another challenge that adolescents with MHC may face is coping with stigma. The mental health literature distinguishes between public stigma and self-stigma. Public stigma refers to negative labeling (stereotype, prejudice and discrimination) of a group of people in order to distance them from society, whereas self-stigma (also termed "internalized stigma") refers to the internalization of those negative labels in a way that changes people's self-perception.<sup>5</sup> While there is ample evidence that youth with MHC experience public stigma,<sup>6,7</sup> self-stigma is under-investigated and insufficiently understood in adolescents with MHC.<sup>8-10</sup> In some studies adolescents' self-stigma has been associated with reduced self-esteem,<sup>11</sup> limited social interactions, secrecy, shame,<sup>12</sup> and less adaptive coping strategies.<sup>13</sup> Recent qualitative findings

1  
2  
3 suggest that adolescents' decisions to disclose their MHC is highly influenced by fear  
4  
5 of stigma.<sup>15 14</sup>  
6

7  
8 A worldwide meta-analysis study showed that 13% of all adolescents cope with  
9  
10 MHC.<sup>16</sup> In Israel, from 1993 to 2016 there was an increase of 130% in the number of  
11  
12 children and adolescents who were admitted to psychiatric hospitals. In 2016, 767  
13  
14 adolescents aged 12 to 17 were admitted to these hospitals.<sup>17</sup>  
15

16  
17 A bill entitled "Rights and Services for Children and Adolescents with Mental  
18  
19 Difficulties" was submitted to the Israeli Knesset for the first time in 2014.<sup>18</sup> The  
20  
21 purpose of the bill was to:  
22

23  
24 .... ensure the rights of children and adolescents with mental disabilities  
25  
26 to rehabilitation and care in the community, in such way as to provide an  
27  
28 appropriate response to their special needs and enable them to integrate  
29  
30 into the community as their peers do, while utilizing their abilities to the  
31  
32 fullest.  
33

34  
35 The bill stressed that children and adolescents must be provided with services in the  
36  
37 community, including leisure activities, care and guidance by counselors from the  
38  
39 field of mental health, and include the provision of information, practical and  
40  
41 emotional support, and assistance in imparting life and social skills.<sup>18</sup> However, to  
42  
43 date this bill has not passed and youth with MHC in Israel thus remain without  
44  
45 legislated state supported rehabilitative psychosocial services in the community.  
46  
47  
48

#### 49 **Services for Youth with MHC in Israel**

50  
51 Adolescents with MHC are provided with different services than those for  
52  
53 adults given their different needs and because the "Rehabilitation in the Community  
54  
55 of Persons with Mental Disabilities Law of 2000" applies only to adults aged 18 and  
56  
57 over.<sup>19</sup> In Israel, there are three main ministries that provide services to children and  
58  
59  
60

1  
2  
3 adolescents with MHC. The Ministry of Health is responsible for the medical  
4 treatment provided by mental health clinics and in psychiatric hospitals. The Ministry  
5 of Labor, Social Affairs and Social Services is responsible for out-of-home care (post-  
6 hospitalization boarding schools). The Ministry of Education is responsible for  
7 educational services within the school system (providing personalized educational and  
8 psychological services), home-schooling and in out-of-home settings. However, the  
9 division of responsibility across the ministries is unclear and coordination is poor.  
10 Particularly problematic is the fact that there is no centralized system for creating a  
11 shared database for use by all three ministries.  
12  
13  
14  
15  
16  
17  
18  
19  
20  
21  
22  
23

24 The proposed study will investigate *Amitim for Youth*, the first community-  
25 based psychosocial rehabilitation program for youth with MHC in Israel. *Amitim for*  
26 *Youth* was established in 2018 by the Israel Association of Community Centers in  
27 cooperation with the Ministry of Health, the Ministry of Education, and the Special  
28 Projects Fund of the National Insurance Institute. The overarching goal of this study is  
29 to generate a best practice model for the implementation of community-based  
30 psychosocial rehabilitation program for youth with MHC. More specifically, the study  
31 will: (1) identify barriers and facilitators for implementation of youth psychosocial  
32 rehabilitation in the community, (2) characterize the continuity of care, or lack  
33 thereof, between the referring mental health professionals (MHP) and the program;  
34 (3) identify the needs of youth participants and their parents, program team, and  
35 referring MHP; (4) assess the satisfaction of youth participants and their parents with  
36 the overall program and its components; (5) characterize the services in the program  
37 and their value according to youth participants.  
38  
39  
40  
41  
42  
43  
44  
45  
46  
47  
48  
49  
50  
51  
52  
53  
54  
55  
56  
57  
58  
59  
60



## The Recovery Approach

For many years, the medical approach in the Western mental health system has been dominant. It views people with MHC as “patients” who should be hospitalized for prolonged periods to reduce their symptoms.<sup>20</sup> In recent decades, the rehabilitation policy of the mental health systems has been influenced by the Personal Recovery Approach which is based on the “person-centered” principle.<sup>21</sup> This approach focuses on integration into the community, improving quality of life, restoring a sense of control, autonomy, choice, meaning, independence as well as responsibility and hope despite the person's symptoms.<sup>20 21</sup> Accordingly, personal recovery is not measured in terms of a reduction in symptoms or by a return to the state prior to the mental crisis, but rather by the ability to rebuild a personal identity and live a meaningful life, with satisfying social roles and a sense of inclusion in the community.<sup>22 23</sup>

In Israel, the transition from the medical approach to the recovery approach has been reflected in several significant changes in the attitude of the state and society towards people with MHC. One of the main changes involved the enactment of the "Rehabilitation in the Community of Persons with Mental Disabilities Law of 2000" that provides a package of rehabilitation services to adults with MHC coping with a significant dysfunction in their life and who are eligible for these services according to criteria determined by law.<sup>24</sup> This law has contributed to increased integration of these individuals in the community which also reduced prolonged hospitalization and residence in institutions.<sup>24</sup> Changes in the attitude of the state and society to people with MHC has led to initiatives to establish a variety of programs for community-based rehabilitation. One of these programs is the *Amitim* program for adults.

## Amitim for Youth

In 2001, the *Amitim* program for adults was established out of commitment to the abovementioned law for the inclusion of adults (aged 18+) with at least a 40% mental disability as determined by the National Insurance Institute.<sup>1</sup> The *Amitim* program is the outcome of cooperation between the Ministry of Health and the Israel Association of Community Centers and operates currently in 77 community centers across the country with about 3000 participants with MHC.

In January 2018, a pioneering *Amitim for Youth* program was launched by the Israel Association of Community Centers in cooperation with the Ministry of Health, the Ministry of Education, and the Special Projects Fund of the National Insurance Institute. An inter-ministerial steering committee that consists of representatives from each of these stakeholders was involved in the founding of the program and its initial implementation. The program provides a response to the absence of community-based psychosocial rehabilitation services in adolescents' after-school leisure time. The program consumers are adolescents (aged 12-18) who have a psychiatric diagnosis and are identified in the education system as those with "code 57". The programs' pilot began gradually in six geographical districts near psychiatric hospitals which have a youth department (Haifa and Beer-Sheva), and near special education schools for children with MHC (Rehovot, Netanya, Petah-Tikva and Carmiel). In each district, there is a coordinator who provides services to about 20 adolescents in the local community centers. Each adolescent in the program is provided with a stipend (1,200 Israeli shekels per year) for participation in leisure activities in the community. The

---

<sup>1</sup> The National Insurance Institute in Israel (NII) determines the disability level (from 0–100%) under the provisions of clauses 33 or 34 of the appendix to the NII Regulations for Determining the Level of Disability. For instance, a 40% mental health disability refers to a person in a post-psychotic condition with significant signs of impairment, limitation of work capacity, and significant disruption of behavioral, mental, and social functioning. See: [https://www.health.gov.il/English/Topics/Mental\\_Health/rehabilitation/Pages/sal.aspx](https://www.health.gov.il/English/Topics/Mental_Health/rehabilitation/Pages/sal.aspx)

1  
2  
3 goals of *Amitim for Youth* relate to three dimensions: youth, their family, and the  
4  
5 wider community. For youth, the goals are to foster socialization and a sense of  
6  
7 belonging to the community, the ability to cope with self-stigma, prevention of  
8  
9 repeated hospitalizations and shorter hospitalization duration, return to age-  
10  
11 appropriate functioning according to personal goals and finding a meaningful activity  
12  
13 that will lead to satisfaction and self-actualization. For the family, the goal of the  
14  
15 program is to provide support by the program's coordinator. Finally, the goal for  
16  
17 members of the community at large is to change attitudes towards youth with MHC  
18  
19 by raising awareness.  
20  
21  
22

### 23 24 **Research Questions**

25  
26 The following research questions will be explored. They relate to:  
27  
28 infrastructure, implementation, and continuity of care.  
29

30  
31 **Program infrastructure:** (1) What characterizes the referral procedure  
32  
33 to the *Amitim for Youth* program, and what are its barriers and facilitators factors? (2)  
34  
35 What characterizes youth who participate in the program? (3) What is the demand for  
36  
37 the various components offered by the program? What services are offered to the  
38  
39 participants and how do they perceive them? What services are missing from the  
40  
41 participants' point of view?  
42  
43

44  
45 **Program implementation:** (4) how is the program implementation experienced by  
46  
47 the stakeholders? (5) What are the barriers and facilitators factors for program  
48  
49 implementation according to the adolescents themselves (participants and dropouts),  
50  
51 parents, team members and referring MHP? (6) What best-practice guidelines emerge  
52  
53 from the perspective of all actors involved?  
54

55  
56 **Continuity of care:** (7) What characterizes the relationship between the referring  
57  
58 MHP and the program team in the community? (8) What best practice guidelines  
59  
60

1  
2  
3 emerge from the interface between referring MHP and community-based services  
4  
5 according to the actors involved?  
6  
7

## 8 **Methods and Analysis**

9  
10 The proposed qualitative study is situated between the pragmatic and  
11  
12 constructivist paradigms.<sup>25</sup> The pragmatic paradigm “focuses primarily on data that  
13  
14 are found to be useful for stakeholders”.<sup>25</sup> It has been defined as a real-world practice-  
15  
16 oriented framework that focuses on useful applications (“what works”) and practical  
17  
18 solutions to problems, to gather information and insights on what is relevant to the  
19  
20 stakeholders.<sup>26 27</sup> The constructivist paradigm “focuses primarily on identifying  
21  
22 multiple values and perspectives”.<sup>25</sup> Accordingly, a close interaction with the  
23  
24 stakeholders will be established to better understand their experiences, by taking the  
25  
26 multiple perceptions of the different stakeholders of the program into consideration.<sup>25</sup>  
27  
28  
29  
30  
31  
32  
33  
34  
35  
36  
37  
38  
39  
40  
41  
42  
43  
44  
45  
46  
47  
48  
49  
50  
51  
52  
53  
54  
55  
56  
57  
58  
59  
60  
26 The two paradigms complement one another, given the fact that their boundaries  
are permeable.<sup>25</sup>

## 35 **Participants**

36  
37  
38 As can be seen in Figure 1, the participants in this study will be composed of  
39  
40 the following six groups of stakeholders: (1) the program decision makers, who  
41  
42 include the program commissioners and funders from different ministries, who are  
43  
44 members of the program's inter-ministerial steering committee; (2) the program team,  
45  
46 which includes coordinators and volunteers; (3) the intended beneficiaries of the  
47  
48 program; namely, adolescents enrolled in the *Amitim for Youth* program for at least  
49  
50 three months; (4) parents of these adolescents; (5) adolescents who dropped out of the  
51  
52 program, and (6) referring MHP from clinics, hospitals, and schools. Each of the six  
53  
54 groups will have about 6-12 participants which is an acceptable number in qualitative  
55  
56 research.  
57  
58  
59  
60

-Insert Figure 1 about here-

Figure 1. The six groups of participants.

## Procedure

The study will follow a *maximum variation sampling* approach of purposefully selecting a wide range of cases to document diversity and common patterns on dimensions of interest,<sup>26</sup> and achieve data saturation until no new relevant knowledge can be obtained from new participants. The research team will reach out by phone to the abovementioned program stakeholders (i.e., decision makers, team members, referring MHP) to invite them to participate in the study. Those who provide their written informed consent will be interviewed at their workplace or on the phone, at their convenience. Parents and adolescents will be approached by the program coordinators who will give the parents a formal letter explaining the study and an informed consent form for the parents' and/or the teens' participation. Only those parents who provide their consent will be contacted by the research team to schedule interviews at their community center or homes, at their convenience. The researchers will also attend the meetings of the program's inter-ministerial steering committee (participants in group 1 above) to document their perspectives and interactions.

## Data Collection

**Semi-structured in-depth interviews.** Adolescents (participants and dropouts) and their parents will be invited to participate in individual interviews, to better understand their subjective experiences.<sup>28</sup> Examples of questions for the adolescents in the program and their parents include: What is important to you to get from the program? What do you suggest maintaining or strengthening in the program? And what do you think should change? Has the program contributed to you and how? Examples of questions for the adolescents who dropped out: How did you experience

1  
2  
3 the program? What relationship would you have liked to have with the coordinator of  
4 the program (frequency, satisfaction)? What made you leave the program, what could  
5 have helped you stay?  
6  
7  
8  
9

10 The referring MHP will be interviewed to characterize and evaluate  
11 recruitment processes and contacts with the program team. For example: What  
12 characterizes the adolescents you refer to the program? Describe the process of  
13 referring adolescents to the program: How is it conducted, what factors help you  
14 decide, what can be improved? Are you updated by the program team about the  
15 adolescents you referred to the program? And if so, how does this take place and for  
16 what length of time?  
17  
18  
19  
20  
21  
22  
23  
24  
25

26 Members of the steering committee will be interviewed to assess the formation  
27 and implementation of the program, for example: What difficulties, challenges and  
28 dilemmas did you encounter during the setting up and implementation of the  
29 program? What can be improved and how? What is missing from the program? The  
30 interviews will be conducted by the first author (HT) and will last roughly 60-90  
31 minutes.  
32  
33  
34  
35  
36  
37  
38  
39

40 **Focus groups.** Each of the program teams (i.e., coordinators and volunteers)  
41 will be invited to attend focus groups, to express their impressions of the training, the  
42 program implementation, as well as their relationship with the participants  
43 (adolescents and their parents) and with the referring MHP. The advantages of focus  
44 groups are that each participant can express his/her opinion, in a collaborative forum  
45 that enables an exchange of different points of view, diverse interpretations, personal  
46 and collective experiences, in an honest and open discussion, without fear of criticism  
47 or censorship.<sup>29</sup> Examples of questions for the coordinators and volunteers: What  
48 preparation and training did you get to work/volunteer in the program? What  
49  
50  
51  
52  
53  
54  
55  
56  
57  
58  
59  
60

1  
2  
3 difficulties, challenges and dilemmas have you encountered in the program? What is  
4 your role definition? Is it clear to you? Describe the relationship with adolescents and  
5 their parents (nature, frequency, content). Note that to minimize social desirability,  
6 individual interviews will also be conducted that may provide a deeper understanding  
7 of each coordinator's personal experience. Focus groups will be conducted by the first  
8 author (HT) and will last 90 minutes.  
9  
10  
11  
12  
13  
14  
15

16  
17 **Sociodemographic questionnaire.** Adolescents will complete a  
18 sociodemographic questionnaire on their age, gender, country of birth, religion, length  
19 of time participating in the program, and number of days a week participating in the  
20 program. The sociodemographic questionnaire for parents will include questions about  
21 socioeconomic status, marital status, their child's medical history and whether their  
22 child takes psychiatric medication.  
23  
24  
25  
26  
27  
28  
29

### 30 **Data Analysis**

31  
32  
33 The qualitative data collected from the interviews and focus groups will be  
34 recorded and transcribed. To identify themes and patterns in the data, the 6-stage  
35 thematic analysis approach will be used, which is comprised of familiarization with  
36 and immersion in the data, coding of the data, constructing initial themes, reviewing  
37 themes, defining and naming themes, and writing up the report with illustrative data  
38 extracts.<sup>30</sup> This thematic analysis procedure will be used within the pragmatic and  
39 constructive frameworks. The analysis will include looking for best practice  
40 guidelines from the perspectives of the different stakeholders in the program.<sup>26 27</sup>  
41  
42  
43  
44  
45  
46  
47  
48  
49  
50  
51  
52  
53  
54  
55  
56  
57  
58  
59  
60  
60  
Meaning and experience will be examined at both semantic and latent levels. The  
checklist for good thematic analysis will be used as a guide to ensure an analysis that  
is rigorous and robust.<sup>31</sup> The data analysis procedure will be conducted by the first  
author (HT) and assessed by second author (HO); disagreements will be resolved by

1  
2  
3 discussion. A qualitative data analysis software (ATLAS.ti v8) will be used for data  
4 management and analysis.  
5  
6

7  
8 To strengthen the credibility of the findings, a triangulation procedure will be  
9  
10 conducted with the qualitative data that will be collected by different methods  
11  
12 (individual interviews and focus groups) and from different types of stakeholders in  
13  
14 the program: the program's decision makers, team, intended beneficiaries, and  
15  
16 referring MHP.<sup>27 32</sup>

### 17 18 19 **Study Trustworthiness**

20  
21 To strengthen the trustworthiness of the findings in addition to the  
22  
23 triangulation, three strategies will be employed, as suggested in the qualitative  
24  
25 research literature.<sup>32</sup> Memo writing will be used to record decision-making, the  
26  
27 process of meaning extraction from the data and subsequent conceptual development,  
28  
29 as well as to facilitate continuous communication within the research team.<sup>33</sup> A  
30  
31 reflexivity journal will be used to gain and maintain self-awareness of the researcher's  
32  
33 perspective and its potential impact on the research process and interpretation of the  
34  
35 findings.<sup>32</sup> To increase the credibility of the research, member checking will be held  
36  
37 (also known as participation validation). In this procedure, the findings will be  
38  
39 presented to the participants who will be asked to respond whether they reflect their  
40  
41 experience, meanings, and perspectives.<sup>32 34</sup> Finally, to enhance the rigor of the study  
42  
43 we will use the 32-item checklist for interviews and focus groups of the Consolidated  
44  
45 Criteria for Reporting Qualitative research (COREQ; see online supplementary file).<sup>35</sup>  
46  
47  
48  
49

### 50 51 **Discussion**

52  
53 To date, youth with MHC in Israel are not eligible for community-based  
54  
55 psychosocial rehabilitation services by law, despite the rising need. No study has  
56  
57 examined a similar community-based psychosocial rehabilitation program for youth  
58  
59  
60



1  
2  
3 with MHC in Israel. The implementation of this type of program can be challenging  
4  
5 because of the pioneering nature of the program and the specific nature of its target  
6  
7 population: adolescents who do not only face age-related challenges but are also  
8  
9 coping with MHC. Thus, recruiting adolescents with MHC to participate in this  
10  
11 research might be challenging given their condition and motivation. Recruiting  
12  
13 referring MHP to participate in the study might be complex possibly due to  
14  
15 inconsistent continuity of care, which refers to the way mental health consumers  
16  
17 perceive and experience their care services as connected and coherent, for example  
18  
19 between hospital and community services.<sup>36</sup> In children and adolescents, coordination  
20  
21 between different services is crucial because they are going through multiple service  
22  
23 transitions and are therefore more vulnerable to the risks of discontinuity.  
24  
25  
26  
27

28  
29 The findings will provide a best practice model to optimize the operation and  
30  
31 implementation by service providers, enhance the service contribution to the  
32  
33 consumers (adolescents and their parents) while meeting their needs and goals, and  
34  
35 inform policy makers. Specific attention will be paid to addressing the potential  
36  
37 barriers and facilitators for effective program implementation. The findings may  
38  
39 ultimately serve as a basis for currently under-developed policy recommendations and  
40  
41 legislation in the field of adolescent psychiatric rehabilitation.  
42  
43

#### 44 **Ethics and dissemination**

45  
46  
47 The study in its current design was approved by the Ethics Committee for  
48  
49 Human Research in the Faculty of Social Welfare and Health Sciences at the  
50  
51 University of Haifa (#455-18), and by the Chief Scientist in the Ministry of Education  
52  
53 (#10566). All participants will sign an informed consent form and will be guaranteed  
54  
55 confidentiality and anonymity. Adolescents' participation will be obtained by their  
56  
57 parents or guardians, which will also be signed by the child. Data collection will be  
58  
59  
60

1  
2  
3 conducted in the next two years (2019-2020). A report in Hebrew will be submitted to  
4  
5 the National Insurance Institute. The results will be disseminated in articles that will  
6  
7 be written in English as part of a doctoral dissertation.  
8  
9

10 **Authors' contributions:** Both authors contributed equally to the conceptualization  
11  
12 and design of the study. HT contacted the literature review that was examined and  
13  
14 approved by HO. Both authors read and approved the final manuscript.  
15  
16

17 **Funding:** The study is funded by the Israeli National Insurance Institute (grant#  
18  
19 16343).  
20  
21

22 **Competing interests:** The authors declare that they have no competing interests. The  
23  
24 funding body will have no role in data collection, analysis, interpretation, or  
25  
26 publications.  
27  
28

29 **Patient and Public Involvement:** We did not involve patients or the public in our  
30  
31 work.  
32  
33

34 **Consent for publication:** Not applicable  
35  
36

37 **Word count:** 3475.  
38  
39  
40  
41  
42  
43  
44  
45  
46  
47  
48  
49  
50  
51  
52  
53  
54  
55  
56  
57  
58  
59  
60

## References

1. Orkibi H, Ronen T. A dual-pathway model linking self-control skills to aggression in adolescents: Happiness and time perspective as mediators. *Journal of Happiness Studies* 2019;20(3):729-42. doi: 10.1007/s10902-018-9967-1
2. Steinberg LD. Adolescence. 11th ed. New York, NY: McGraw-Hill 2017.
3. Erikson EH. Identity: Youth and crisis. New York, NY: W. W. Norton 1968.
4. Dwivedi K, Harper P. Promoting emotional well-being of children and adolescents and preventing their mental ill health a handbook. London, UK: Jessica Kingsley 2004.
5. Corrigan PW, Watson AC. The paradox of self-stigma and mental illness. *Clinical Psychology: Science and Practice* 2002;9(1):35-53. doi: 10.1093/clipsy.9.1.35
6. Martínez-Hidalgo MN, Lorenzo-Sánchez E, García JLL, et al. Social contact as a strategy for self-stigma reduction in young adults and adolescents with mental health problems. *Psychiatry Research* 2018;260:443-50. doi: <https://doi.org/10.1016/j.psychres.2017.12.017>
7. Mulfinger N, Müller S, Böge I, et al. Honest, open, proud for adolescents with mental illness: Pilot randomized controlled trial. *Journal of Child Psychology Psychiatry* 2018;59(6):684-91. doi: <https://doi.org/10.1111/jcpp.12853>
8. Kaushik A, Kostaki E, Kyriakopoulos M. The stigma of mental illness in children and adolescents: A systematic review. *Psychiatry Research* 2016;243:469-94. doi: <https://doi.org/10.1016/j.psychres.2016.04.042>
9. Rose AL, Atkey SK, Goldberg JO. Self-stigma in youth: Prevention, intervention, and the relevance for schools. In: Leschied AW, Saklofske DH, Flett GL, eds. Handbook of school-based mental health promotion: An evidence-informed framework for implementation. Cham, Switzerland: Springer 2018:213-35.

- 1  
2  
3 10. Leschied AW, Saklofske DH, Flett GL. Handbook of school-based mental health  
4 promotion: An evidence-informed framework for implementation. Cham,  
5 Switzerland: Springer 2018.  
6  
7  
8  
9  
10 11. Hartman LI, Michel NM, Winter A, et al. Self-stigma of mental illness in high  
11 school youth. *Canadian Journal of School Psychology* 2013;28(1):28-42. doi:  
12 10.1177/0829573512468846  
13  
14  
15  
16 12. Kranke D, Floersch J, Townsend L, et al. Stigma experience among adolescents  
17 taking psychiatric medication. *Children and Youth Services Review*  
18 2010;32(4):496-505. doi: <https://doi.org/10.1016/j.chilyouth.2009.11.002>  
19  
20  
21  
22  
23 13. Moses T. Coping strategies and self-stigma among adolescents discharged from  
24 psychiatric hospitalization: A 6-month follow-up study. *International Journal*  
25 *of Social Psychiatry* 2015;61(2):188-97. doi: 10.1177/0020764014540146  
26  
27  
28  
29  
30 14. Mulfinger N, Rüsç N, Bayha P, et al. Secrecy versus disclosure of mental illness  
31 among adolescents: II. The perspective of relevant stakeholders. *Journal of*  
32 *Mental Health* 2019;28(3):304-11. doi: 10.1080/09638237.2018.1487537  
33  
34  
35  
36  
37 15. Mulfinger N, Rüsç N, Bayha P, et al. Secrecy versus disclosure of mental illness  
38 among adolescents: I. The perspective of adolescents with mental illness.  
39 *Journal of Mental Health* 2019;28(3):296-303. doi:  
40 10.1080/09638237.2018.1487535  
41  
42  
43  
44  
45  
46  
47 16. Polanczyk GV, Salum GA, Sugaya LS, et al. Annual research review: A meta-  
48 analysis of the worldwide prevalence of mental disorders in children and  
49 adolescents. *The Journal of Child Psychology and Psychiatry* 2015;56(3):345-  
50 65. doi: <https://doi.org/10.1111/jcpp.12381> [published Online First:  
51 2015/02/05]  
52  
53  
54  
55  
56  
57  
58  
59  
60

- 1  
2  
3 17. Israel National Council for the Child. Israel national council for the child,  
4  
5 statistical abstract "children in Israel 2017" 2017 [Data Collection]. Available  
6  
7 from: <https://www.children.org.il/>  
8  
9
- 10 18. The Knesset. Proposed Rights and Services for Children and Youth with Mental  
11  
12 Disorders Law, 5766 - 2016. (P / 2783/20) 2019 [Available from:  
13  
14 [http://fs.knesset.gov.il//20/law/20\\_lst\\_323138.docx.](http://fs.knesset.gov.il//20/law/20_lst_323138.docx.)]  
15  
16
- 17 19. Rabinowitz M. Children in israel: Selected issues regarding rights, needs and  
18  
19 services. Israel: The Committee on the Rights of the Child, 20th Knesset. 2015  
20  
21
- 22 20. Anthony WA. Recovery from mental illness: The guiding vision of the mental  
23  
24 health service system in the 1990s. *Psychosocial Rehabilitation Journal*  
25  
26 1993;16(4):11-23. doi: 10.1037/h0095655  
27  
28
- 29 21. Davidson L. The recovery movement: Implications for mental health care and  
30  
31 enabling people to participate fully in life. *Health Aff (Millwood)*  
32  
33 2016;35(6):1091-7. doi: 10.1377/hlthaff.2016.0153 [published Online First:  
34  
35 2016/06/09]  
36  
37
- 38 22. Schrank B, Slade M. Recovery in psychiatry. *Psychiatric Bulletin*  
39  
40 2018;31(09):321-25. doi: 10.1192/pb.bp.106.013425 [published Online First:  
41  
42 2018/01/02]  
43  
44
- 45 23. Slade M. Personal recovery and mental illness: A guide for mental health  
46  
47 professionals. Cambridge: Cambridge University Press 2009.  
48
- 49 24. Aviram U, Ginath Y, Roe D. Mental health reforms in europe: Israel's  
50  
51 rehabilitation in the community of persons with mental disabilities law:  
52  
53 Challenges and opportunities. *Psychiatric Services* 2012;63(2):110-12. doi:  
54  
55 10.1176/appi.ps.201100009 [published Online First: 2012/02/04]  
56  
57  
58  
59  
60

- 1  
2  
3 25. Mertens DM, Wilson AT. Program evaluation theory and practice. 2nd ed. New  
4  
5 York, NY: Guilford Press 2018.  
6  
7  
8 26. Patton MQ. Qualitative research & evaluation methods: Integrating theory and  
9  
10 practice. 4th ed. Thousand Oaks, CA: SAGE 2015.  
11  
12 27. Creswell JW, Clark VLP. Designing and conducting mixed methods research. 3th  
13  
14 ed. Los angeles, CA: Sage 2017.  
15  
16  
17 28. Kvale S, Brinkmann S. Interviews: Learning the craft of qualitative research  
18  
19 interviewing. Thousand Oaks, CA: Sage 2009.  
20  
21 29. Bloor M. Focus groups in social research. Thousand Oaks, CA: SAGE 2001.  
22  
23  
24 30. Braun V, Clarke V, Hayfield N, et al. Thematic analysis. In: Liamputtong P, ed.  
25  
26 Handbook of research methods in health social sciences. Singapore: Springer  
27  
28 Singapore 2019:843-60.  
29  
30  
31 31. Terry G, Hayfield N, Clarke V, et al. Thematic analysis. In: Willig C, Rogers WS,  
32  
33 eds. The SAGE handbook of qualitative research in psychology. London, UK:  
34  
35 SAGE 2017:17-37.  
36  
37  
38 32. Shenton AK. Strategies for ensuring trustworthiness in qualitative research  
39  
40 projects. *Education for Information* 2004;22(2):63-75. doi: 10.3233/EFI-2004-  
41  
42 22201  
43  
44  
45 33. Birks M, Chapman Y, Francis K. Memoing in qualitative research: Probing data  
46  
47 and processes. *Journal of Research in Nursing* 2008;13(1):68-75. doi:  
48  
49 10.1177/1744987107081254  
50  
51  
52 34. Foster A. A nonlinear model of information-seeking behavior. *Journal of the*  
53  
54 *American Society for Information Science and Technology* 2004;55(3):228-37.  
55  
56 doi: 10.1002/asi.10359  
57  
58  
59  
60

- 1  
2  
3 35. Tong A, Sainsbury P, Craig J. Consolidated criteria for reporting qualitative  
4  
5 research (COREQ): a 32-item checklist for interviews and focus groups. *Int J*  
6  
7 *Qual Health Care* 2007;19(6):349-57. doi: 10.1093/intqhc/mzm042 [published  
8  
9 Online First: 2007/09/18]  
10  
11  
12 36. Joyce AS, Wild TC, Adair CE, et al. Continuity of care in mental health services:  
13  
14 Toward clarifying the construct. *The Canadian Journal of Psychiatry*  
15  
16 2004;49(8):539-50. doi: 10.1177/070674370404900805 [published Online  
17  
18 First: 2004/09/30]  
19  
20  
21  
22  
23  
24  
25  
26  
27  
28  
29  
30  
31  
32  
33  
34  
35  
36  
37  
38  
39  
40  
41  
42  
43  
44  
45  
46  
47  
48  
49  
50  
51  
52  
53  
54  
55  
56  
57  
58  
59  
60

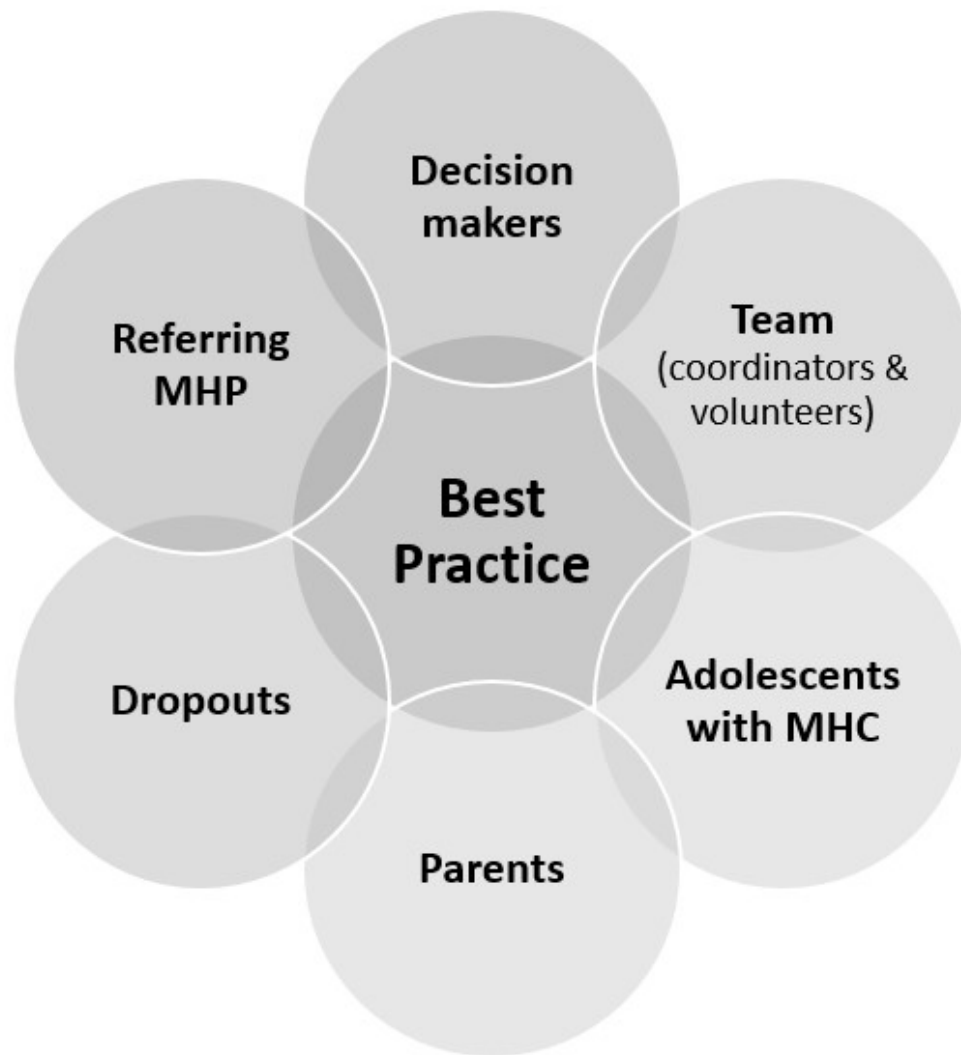

Figure 1. Six groups of participants in the study



## COREQ- Consolidated criteria for reporting qualitative research: a 32-item checklist for interviews and focus groups

Tuaf, H. & Orkibi, H. (2019). A community-based rehabilitation program for youth with mental health conditions: A qualitative implementation study protocol.

| Section/Topic                                  | Item # | Checklist item                                                                                                                                           | Reported on page # |
|------------------------------------------------|--------|----------------------------------------------------------------------------------------------------------------------------------------------------------|--------------------|
| <b>Domain 1: Research team and reflexivity</b> |        |                                                                                                                                                          |                    |
| <b>Personal characteristics</b>                |        |                                                                                                                                                          |                    |
| Interviewer/facilitator                        | 1      | Which author/s conducted the interview or focus group?                                                                                                   | 12                 |
| Credentials                                    | 2      | What were the researcher's credentials? E.g. PhD, MD                                                                                                     | 16                 |
| Occupation                                     | 3      | What was their occupation at the time of the study?                                                                                                      | 16                 |
| Gender                                         | 4      | Was the researcher male or female?                                                                                                                       | 16                 |
| Experience and training                        | 5      | What experience or training did the researcher have?                                                                                                     | 16                 |
| <b>Relationship with participants</b>          |        |                                                                                                                                                          |                    |
| Relationship established                       | 6      | Was a relationship established prior to study commencement?                                                                                              | 10-11              |
| Participant knowledge of the interviewer       | 7      | What did the participants know about the researcher? e.g. personal goals, reasons for doing the research                                                 | 16                 |
| Interviewer characteristics                    | 8      | What characteristics were reported about the interviewer/facilitator? e.g. Bias, assumptions, reasons and interests in the research topic                | 16                 |
| <b>Domain 2: Study design</b>                  |        |                                                                                                                                                          |                    |
| <b>Theoretical framework</b>                   |        |                                                                                                                                                          |                    |
| Methodological orientation and Theory          | 9      | What methodological orientation was stated to underpin the study? e.g. grounded theory, discourse analysis, ethnography, phenomenology, content analysis | 9,10               |
| <b>Participant selection</b>                   |        |                                                                                                                                                          |                    |
| Sampling                                       | 10     | How were participants selected? e.g. purposive, convenience, consecutive, snowball                                                                       | 10                 |
| Method of approach                             | 11     | How were participants approached? e.g. face-to-face, telephone, mail, email                                                                              | 10,11              |
| Sample size                                    | 12     | How many participants were in the study?                                                                                                                 | N/A                |
| Non-participation                              | 13     | How many people refused to participate or dropped out? Reasons?                                                                                          | N/A                |
| Setting of data collection                     | 14     | Where was the data collected? e.g. home, clinic, workplace                                                                                               | 10,11              |
| Presence of non-participants                   | 15     | Was anyone else present besides the participants and researchers?                                                                                        | 12,13              |
| Description of sample                          | 16     | What are the important characteristics of the sample? e.g. demographic data, date                                                                        | 12,13              |
| <b>Data collection</b>                         |        |                                                                                                                                                          |                    |
| Interview guide                                | 17     | Were questions, prompts, guides provided by the authors? Was it pilot tested?                                                                            | 11, 12             |
| Repeat interviews                              | 18     | Were repeat interviews carried out? If yes, how many?                                                                                                    | N/A                |
| Audio/visual recording                         | 19     | Did the research use audio or visual recording to collect the data?                                                                                      | 13                 |
| Field notes                                    | 20     | Were field notes made during and/or after the interview or focus group?                                                                                  | 13                 |
| Duration                                       | 21     | What was the duration of the interviews or focus group?                                                                                                  | 12                 |
| Data saturation                                | 22     | Was data saturation discussed?                                                                                                                           | 10                 |

## COREQ- Consolidated criteria for reporting qualitative research: a 32-item checklist for interviews and focus groups

| Section/Topic                          | Item # | Checklist item                                                                                                                    | Reported on page # |
|----------------------------------------|--------|-----------------------------------------------------------------------------------------------------------------------------------|--------------------|
| Transcripts returned                   | 23     | Were transcripts returned to participants for comment and/or correction?                                                          | N/A                |
| <b>Domain 3: Analysis and findings</b> |        |                                                                                                                                   |                    |
| <b>Data analysis</b>                   |        |                                                                                                                                   |                    |
| Number of data coders                  | 24     | How many data coders coded the data?                                                                                              | 13                 |
| Description of the coding tree         | 25     | Did authors provide a description of the coding tree?                                                                             | N/A                |
| Derivation of themes                   | 26     | Were themes identified in advance or derived from the data?                                                                       | 13                 |
| Software                               | 27     | What software, if applicable, was used to manage the data?                                                                        | 13                 |
| Participant checking                   | 28     | Did participants provide feedback on the findings?                                                                                | 14                 |
| <b>Reporting</b>                       |        |                                                                                                                                   |                    |
| Quotations presented                   | 29     | Were participant quotations presented to illustrate the themes / findings? Was each quotation identified? e.g. participant number | N/A                |
| Data and findings consistent           | 30     | Was there consistency between the data presented and the findings?                                                                | N/A                |
| Clarity of major themes                | 31     | Were major themes clearly presented in the findings?                                                                              | N/A                |
| Clarity of minor themes                | 32     | Is there a description of diverse cases or discussion of minor themes?                                                            | N/A                |

**Note:** The checklist consists of items that should be included in reports on a qualitative study that has been completed. N/A = item not applicable to the current protocol of a study in the participant recruitment phase.

### Checklist reference:

Tong A, Sainsbury P, Craig J. Consolidated criteria for reporting qualitative research (COREQ): a 32-item checklist for interviews and focus groups. *International Journal for Quality in Health Care*. 2007; 19(6): 349-357.

# BMJ Open

## A community-based rehabilitation program for youth with mental health conditions in Israel: a qualitative study protocol

|                                 |                                                                                                                                           |
|---------------------------------|-------------------------------------------------------------------------------------------------------------------------------------------|
| Journal:                        | <i>BMJ Open</i>                                                                                                                           |
| Manuscript ID                   | bmjopen-2019-032809.R1                                                                                                                    |
| Article Type:                   | Protocol                                                                                                                                  |
| Date Submitted by the Author:   | 22-Oct-2019                                                                                                                               |
| Complete List of Authors:       | Tuaf, Hila; University of Haifa, School of Creative Arts Therapies<br>Orkibi, Hod; University of Haifa, School of Creative Arts Therapies |
| <b>Primary Subject Heading</b>: | Mental health                                                                                                                             |
| Secondary Subject Heading:      | Qualitative research                                                                                                                      |
| Keywords:                       | MENTAL HEALTH, QUALITATIVE RESEARCH, Child & adolescent psychiatry < PSYCHIATRY                                                           |
|                                 |                                                                                                                                           |

SCHOLARONE™  
Manuscripts

1  
2  
3 14  
5  
6 2 A community-based rehabilitation program for youth with mental health  
7  
8 3 conditions in Israel: a qualitative study protocol  
910  
11 412  
13  
14 5 Hila Tuaf<sup>1</sup> and Hod Orkibi<sup>1</sup>  
1516  
17 618  
19 7 <sup>1</sup> School of Creative Arts Therapies, Faculty of Social Welfare and Health  
20  
21  
22 8 Sciences, University of Haifa, Israel  
2324  
25 926  
27  
28  
29  
30 11 Corresponding author: H. Orkibi, University of Haifa,  
3132  
33 12 199 Aba Khoushy Av., Mount Carmel, Haifa 3498838, Israel  
3435  
36 13 [horkibi@univ.haifa.ac.il](mailto:horkibi@univ.haifa.ac.il)  
3738  
39 14 Cell: +972544393621  
4041  
42 15 ORCID ID: <https://orcid.org/0000-0003-1498-7953>  
4344  
45 1646  
47 1748  
49 18 Word count: 3641  
5051  
52 1953  
54 2055  
56 2157  
58  
59 22  
60

## 1 **Abstract**

2 **Introduction:** In Israel, 12% of all adolescents have mental health conditions.

3 Approximately 600 adolescents with mental health conditions are hospitalized each  
4 year and about 40% of them return to the hospital and are thus cut off from their daily  
5 lives and peers in the community. In contrast to adults, adolescents with mental health  
6 conditions in Israel are not eligible by law for rehabilitation services. Thus, the  
7 overarching goal of this qualitative study is to generate a best practice model for the  
8 implementation of community-based psychosocial rehabilitation program for this  
9 population by examining *Amitim for Youth*, the first program in Israel established in  
10 2018 by the Israel Association of Community Centers in cooperation with the  
11 Ministry of Health, the Ministry of Education, and the Special Projects Fund of the  
12 National Insurance Institute.

13 **Methods and analysis:** Qualitative data will be collected through in-depth semi-  
14 structured interviews and focus groups. To identify themes and patterns in the data,  
15 the 6-stage reflexive thematic analysis approach will be used. A triangulation  
16 procedure will be conducted to strengthen the validity of the findings collected by  
17 different methods and from different types of stakeholders in the program: the  
18 program's decision makers, program team members, intended beneficiaries and  
19 referring mental health professionals. To insure the trustworthiness of the findings,  
20 three strategies will be employed: memos writing, reflexive journaling, and member  
21 checking.

22 **Ethics and dissemination:** This study was approved by the Ethics Committee for  
23 Human Research in the Faculty of Social Welfare and Health Sciences at the  
24 University of Haifa (#455-18) and by the Chief Scientist in the Ministry of Education  
25 (#10566). All participants will sign an informed consent form and will be guaranteed

1 confidentiality and anonymity. Data collection will be conducted in the next two years  
2 (2019-2020). After data analysis, the findings will be disseminated via publications.

### 3 **Strengths and limitations of this study**

- 4 • This is a pioneering study that will examine a community-based psychosocial  
5 rehabilitation program for adolescents with mental health conditions in Israel.
- 6 • The findings will inform the development of a best practice model to meet the  
7 needs and goals of all stakeholders by addressing potential barriers and facilitators  
8 for program implementation.
- 9 • The findings may contribute to policy recommendations and legislation relating to  
10 adolescent psychiatric rehabilitation.
- 11 • Recruiting adolescents with mental health conditions may be challenging due to  
12 their psychiatric condition.

13  
14 **Keywords:** adolescents, youth, psychiatric rehabilitation, mental illness, mental  
15 health, recovery, community.

## 1 Introduction

### 2 Adolescents with Mental Health Conditions (MHC)

3 Adolescence is characterized by physiological, psychological and social  
4 changes that are known to be associated with many challenges.<sup>1,2</sup> According to  
5 Erikson's psychosocial developmental theory,<sup>3</sup> adolescents are in the “identity versus  
6 role confusion” stage, where they search for personal identity and strive for  
7 independence through the exploration of social roles, personal values, beliefs and  
8 goals while distancing themselves from their parents. For adolescents with MHC (i.e.,  
9 who have a psychiatric diagnosis) this developmental task is even more complex and  
10 may lead to a lack of identity formation or a negative identity.<sup>2</sup> Adolescents with  
11 MHC may also have to deal with maladaptive thoughts, dysregulated emotions and  
12 behaviors which may impact their interaction with peers and family members,  
13 academic performance, and in severe cases may involve loss of contact with reality.<sup>4</sup>  
14 Therefore, it is important to differentiate between the needs of adolescents who face  
15 age-appropriate challenges and adolescents who have MHC.

16 Another challenge that adolescents with MHC may face is coping with stigma.  
17 The mental health literature distinguishes between public stigma and self-stigma.<sup>5</sup>  
18 Public stigma refers to negative labeling (stereotype, prejudice and discrimination) of  
19 a group of people to distance them from society, whereas self-stigma (also termed  
20 internalized stigma”) refers to the internalization of those negative labels in a way that  
21 changes people’s self-perception.<sup>5</sup> While there is ample evidence that adolescents  
22 with MHC experience public stigma,<sup>6,7</sup> self-stigma is under-investigated and  
23 insufficiently understood for adolescents with MHC.<sup>8-10</sup> In some studies adolescents'  
24 self-stigma has been associated with reduced self-esteem,<sup>11</sup> limited social interactions,  
25 secrecy, shame,<sup>12</sup> and less adaptive coping strategies.<sup>13</sup> Recent qualitative findings

1 suggest that adolescents' decisions to disclose their MHC is highly influenced by fear  
2 of stigma.<sup>14 15</sup> A worldwide meta-analysis study reported that 13% of all adolescents  
3 have MHC.<sup>16</sup> In Israel, from 1993 to 2016 there was an increase of 130% in the  
4 number of children and adolescents who were admitted to psychiatric hospitals. In  
5 2016, 767 adolescents aged 12 to 17 were admitted to Israeli hospitals.<sup>17</sup>

6 A legislative bill entitled "Rights and Services for Children and Adolescents  
7 with Mental Difficulties" was submitted to the Israeli Knesset for the first time in  
8 2014.<sup>18</sup> The purpose of the bill was to:

9 .... ensure the rights of children and adolescents with mental disabilities  
10 to rehabilitation and care in the community, in such way as to provide an  
11 appropriate response to their special needs and enable them to integrate  
12 into the community as their peers do, while utilizing their abilities to the  
13 fullest.

14 The bill stressed that children and adolescents must be provided with services in the  
15 community, including leisure activities, care and guidance by counselors from the  
16 field of mental health, and include the provision of information, practical and  
17 emotional support, and assistance in imparting life and social skills.<sup>18</sup> However, this  
18 bill has not been passed and adolescents with MHC in Israel thus remain without  
19 legislated, state supported rehabilitative psychosocial services in the community.

20 Note that in line with the recovery approach described below, we adopt the  
21 widely used umbrella term "mental health conditions" (rather than mental illness or  
22 psychiatric disorders or disability), which is consistent with the United Nations  
23 General Assembly 2017 report on Mental Health and Human Rights.<sup>19</sup>



## 1 **Services for Adolescents with MHC in Israel**

2 Adolescents with MHC are provided with different services than those for  
3 adults given their different needs and because the “Rehabilitation in the Community  
4 of Persons with Mental Disabilities Law of 2000” applies only to adults aged 18 and  
5 over.<sup>20</sup> In Israel, there are three main ministries that provide services to children and  
6 adolescents with MHC. The Ministry of Health is responsible for the medical  
7 treatment provided by mental health clinics and in psychiatric hospitals. The Ministry  
8 of Labor, Social Affairs and Social Services is responsible for out-of-home care (post-  
9 hospitalization boarding schools). The Ministry of Education is responsible for  
10 educational services within the school system (providing personalized educational and  
11 psychological services), home-schooling and in out-of-home settings. However, the  
12 division of responsibility across the ministries is unclear and coordination is poor.  
13 Particularly problematic is that there is no centralized database with data on service  
14 consumers across the three ministries in Israel that provide services for adolescents  
15 with MHC. This may lead to inconsistent continuity of care, which refers to the way  
16 mental health consumers perceive and experience their care services as connected and  
17 coherent, for example between hospital and community services.<sup>21</sup>

## 18 **The Recovery Approach**

19 For many years, the medical approach in the Westernized mental health  
20 system has been dominant. It views people with MHC as “patients” who should be  
21 hospitalized for prolonged periods to reduce their symptoms.<sup>22</sup> In recent decades, the  
22 rehabilitation policy of the mental health systems has been influenced by the Personal  
23 Recovery Approach which is based on the “person-centered” principle.<sup>23</sup> This  
24 approach focuses on integration into the community, improving quality of life,  
25 restoring a sense of control, autonomy, choice, meaning, independence as well as

1 responsibility and hope despite the person's symptoms.<sup>22 23</sup> Accordingly, personal  
2 recovery is not measured in terms of a reduction in symptoms or by a return to the  
3 state prior to the mental crisis, but rather by the ability to rebuild a personal identity  
4 and live a meaningful life, with satisfying social roles and a sense of inclusion in the  
5 community.<sup>24 25</sup>

6 In Israel, the transition from the medical approach to the recovery approach  
7 has been reflected in several significant changes in the attitude of the state and society  
8 towards people with MHC. One of the main changes involved the enactment of the  
9 “Rehabilitation in the Community of Persons with Mental Disabilities Law of 2000”  
10 that provides a package of rehabilitation services to adults with MHC with a  
11 significant dysfunction in their life and who are eligible for these services according  
12 to criteria determined by law.<sup>26</sup> This law has contributed to increased integration of  
13 these individuals in the community which also reduced prolonged hospitalization and  
14 residence in institutions.<sup>26</sup> Changes in the attitude of the state and society to people  
15 with MHC has led to initiatives to establish a variety of programs for community-  
16 based rehabilitation. One of these programs is the *Amitim* program for adults. The  
17 program was established at 2001, to comply with the abovementioned law for the  
18 inclusion of adults (aged 18+) with at least a 40% mental disability as determined by  
19 the National Insurance Institute.<sup>1</sup> The *Amitim* program is the outcome of cooperation  
20 between the Ministry of Health and the Israel Association of Community Centers and  
21 operates currently in 77 community centers across the country. It currently serves  
22 about 3000 adults with MHC.

---

<sup>1</sup> The National Insurance Institute in Israel (NII) determines the disability level (from 0–100%) under the provisions of clauses 33 or 34 of the appendix to the NII Regulations for Determining the Level of Disability. For instance, a 40% mental health disability refers to a person in a post-psychotic condition with significant signs of impairment, limitation of work capacity, and significant disruption of behavioral, mental, and social functioning. See: [https://www.health.gov.il/English/Topics/Mental\\_Health/rehabilitation/Pages/sal.aspx](https://www.health.gov.il/English/Topics/Mental_Health/rehabilitation/Pages/sal.aspx)

1           The literature on the recovery approach highlights the importance for services  
2 to consider adolescents' developmental needs for independence, self-determination,  
3 and self-efficacy when implementing a recovery-oriented adolescent-centered  
4 approach.<sup>27-29</sup> This approach, which encourages them to express their needs and  
5 opinions about the services and engage actively in their rehabilitation process,<sup>27 28 30-33</sup>  
6 was adopted by the *Amitim for Youth* program.

### 7 **Amitim for Youth**

8           In January 2018, a pioneering *Amitim for Youth* program was launched by the  
9 Israel Association of Community Centers in cooperation with the Ministry of Health,  
10 the Ministry of Education, and the Special Projects Fund of the National Insurance  
11 Institute. An inter-ministerial steering committee that consisted of representatives  
12 from each of these stakeholders was involved in the founding of the program and its  
13 initial implementation. The program provides a response to the absence of  
14 community-based psychosocial rehabilitation services for adolescents' after-school  
15 leisure time. The program consumers are adolescents (aged 12-18) who have a  
16 psychiatric diagnosis and are identified in the education system as those with "code  
17 57". The programs' pilot was gradually implemented in six geographical districts near  
18 psychiatric hospitals which have a youth department (Haifa and Beer-Sheva), and  
19 near special education schools for children with MHC (Rehovot, Netanya, Petah-  
20 Tikva and Carmiel). In each district, there is a coordinator who provides services to  
21 approximately 20 adolescents in the local community centers. Each adolescent in the  
22 program is provided with a stipend (1,200 Israeli shekels per year) for participation in  
23 leisure and arts activities in the community. The goals of *Amitim for Youth* relate to  
24 three dimensions: adolescents, their family, and the wider community. For  
25 adolescents, the goals are to foster socialization and a sense of belonging to the

1  
2  
3 1 community, the ability to cope with self-stigma, prevention of repeated  
4  
5 2 hospitalizations and shorter hospitalization duration, return to age-appropriate  
6  
7 3 functioning according to personal goals and finding a meaningful activity that will  
8  
9 4 lead to satisfaction and self-actualization. Another goal of the program is to provide  
10  
11 5 support to the adolescents' family members (particularly parents), which is facilitated  
12  
13 6 by the program's coordinator in each district. Finally, the goal for members of the  
14  
15 7 community at large is to change attitudes towards adolescents with MHC by raising  
16  
17 8 awareness.

18  
19  
20  
21 9 The overarching goal of this study is to generate a best practice model for the  
22  
23 10 implementation of community-based psychosocial rehabilitation program for  
24  
25 11 adolescents with MHC. More specifically, the study will: (1) identify barriers and  
26  
27 12 facilitators for implementation of adolescents psychosocial rehabilitation in the  
28  
29 13 community, (2) characterize the continuity of care, or lack thereof, between the  
30  
31 14 referring mental health professionals (MHP) and the program; (3) identify the needs  
32  
33 15 of adolescents and their parents, program team, and referring MHP; (4) assess the  
34  
35 16 satisfaction of adolescents and their parents with the overall program and its  
36  
37 17 components; (5) characterize the services in the program and their value according to  
38  
39 18 adolescents.

### 19 **Research Questions**

20 The following research questions will be explored. They relate to:  
21  
22 infrastructure, implementation, and continuity of care.

23 **Program infrastructure:** (1) What characterizes the referral procedure  
24 for the *Amitim for Youth* program, and what are the barriers and facilitators factors?  
25 (2) What characterizes adolescents who participate in the program? (3) What is the  
demand for the various components offered by the program (including the arts)?

1  
2  
3 1 What services are offered to the participants and how do they perceive them? What  
4  
5 2 services are missing from the participants' perspective?  
6  
7

8 3 **Program implementation:** (4) How is the program implementation experienced by  
9  
10 4 the stakeholders? (5) What are the barriers and facilitators factors for program  
11  
12 5 implementation according to the adolescents themselves (participants and those who  
13  
14 6 withdrew), parents, program team members, and referring MHP? (6) What best-  
15  
16 7 practice guidelines emerge from the perspective of all involved?  
17  
18

19 8 **Continuity of care:** (7) What characterizes the relationship between the referring  
20  
21 9 MHP and the program team in the community? (8) What best practice guidelines  
22  
23 10 emerge from the interface between referring MHP and community-based services  
24  
25 11 according to the actors involved?  
26  
27

## 28 12 **Methods and Analysis**

29  
30 13 The proposed qualitative study is situated between the pragmatic and  
31  
32 14 constructivist paradigms.<sup>34</sup> The pragmatic paradigm “focuses primarily on data that  
33  
34 15 are found to be useful for stakeholders”.<sup>34</sup> It has been defined as a real-world practice-  
35  
36 16 oriented framework that focuses on useful applications (“what works”) and practical  
37  
38 17 solutions to problems, to gather information and insights on what is relevant to the  
39  
40 18 stakeholders.<sup>35 36</sup> The constructivist paradigm “focuses primarily on identifying  
41  
42 19 multiple values and perspectives”.<sup>34</sup> Accordingly, a close interaction with the  
43  
44 20 stakeholders will be established to better understand their experiences, by taking the  
45  
46 21 multiple perceptions of the different stakeholders of the program into consideration.<sup>34</sup>  
47  
48  
49

50  
51 22 <sup>35</sup> The two paradigms complement one another, given that their boundaries are  
52  
53 23 permeable.<sup>34</sup>  
54  
55

56 24

57  
58 25  
59  
60

## 1 **Participants**

2 As can be seen in Figure 1, the participants in this study will be composed of  
3 the following six groups of stakeholders: (1) the program decision makers, who  
4 include the program commissioners and funders from different ministries, who are  
5 members of the program's inter-ministerial steering committee; (2) the program team  
6 members, which includes coordinators and volunteers; (3) the intended beneficiaries  
7 of the program; namely, adolescents enrolled in the *Amitim for Youth* program for at  
8 least three months; (4) parents of these adolescents; (5) adolescents who withdrew  
9 from the program, and (6) referring MHP from clinics, hospitals, and schools. Each of  
10 the six groups will have approximately 6-12 participants which is an acceptable  
11 number in qualitative research.

12 -Insert Figure 1 about here-

13 Figure 1. The six groups of participants.

## 14 **Procedure**

15 The study will use a *maximum variation sampling* approach of purposefully  
16 selecting a wide range of cases to document diversity and common patterns on  
17 dimensions of interest.<sup>35</sup> The research team will contact the program decision makers  
18 and program team members by phone to invite them to participate in the study. The  
19 program coordinators will contact the parents and referring MHP via a formal letter  
20 explaining the study and including an informed consent form. Only those who provide  
21 their written informed consent will be contacted by the research team to schedule an  
22 interview. The MHP will be interviewed at their workplace or via the phone, at a  
23 convenient time for them. The parents and adolescents will be interviewed at their  
24 community center or homes, at a time of their convenience. The researchers will also

1 attend the meetings of the program's inter-ministerial steering committee (participants  
2 in group 1 above) to document their perspectives and interactions.

### 3 **Data Collection**

4 **Semi-structured in-depth interviews.** Adolescents and their parents will be  
5 invited to participate in individual interviews, to better understand their subjective  
6 experiences.<sup>37</sup> Examples of questions for the adolescents in the program and their  
7 parents include: What do you want to get from the program? What should be  
8 maintained or strengthened in the program? What do you think should change in the  
9 program? What benefits have you received from the program? Examples of questions  
10 for the adolescents who withdrew from the program: How did you experience the  
11 program? What relationship would you have liked to have with the coordinator of the  
12 program (frequency, satisfaction)? What made you leave the program, what could  
13 have helped you stay?

14 The referring MHP will be interviewed to describe and evaluate recruitment  
15 processes and contacts with the program team in terms of continuity of care. For  
16 example: What characterizes the adolescents you refer to the program? Describe the  
17 process of referring adolescents to the program: How is it conducted, what factors  
18 help you decide, what can be improved? Are you updated by the program team about  
19 the adolescents you referred to the program? And if so, how does this take place and  
20 for what length of time?

21 Members of the steering committee will be interviewed to assess the  
22 development and implementation of the program, for example: What difficulties,  
23 challenges and dilemmas did you encounter during the setting up and implementation  
24 of the program? What can be improved and how? What is missing from the program?

1  
2  
3 1 The interviews will be conducted by the first author (HT) and will last approximately  
4  
5 2 60-90 minutes.

6  
7  
8 3 **Focus groups.** Each of the program teams (i.e., coordinators and volunteers)  
9  
10 4 will be invited to attend focus groups, to discuss their impressions of the training, the  
11  
12 5 program implementation, as well as their relationship with the participants  
13  
14 6 (adolescents and their parents) and with the referring MHP. The advantages of focus  
15  
16 7 groups are that each participant can express his/her opinion, in a collaborative forum  
17  
18 8 that enables an exchange of different points of view, diverse interpretations, personal  
19  
20 9 and collective experiences, in an honest and open discussion, without fear of criticism  
21  
22 10 or censorship.<sup>38</sup> Examples of questions for the coordinators and volunteers: What  
23  
24 11 preparation and training did you receive to work/volunteer in the program? What  
25  
26 12 difficulties, challenges and dilemmas have you encountered in the program? Describe  
27  
28 13 your role. Is your role clear to you? How would you describe your relationship with  
29  
30 14 the adolescents and their parents (nature, frequency, content)? Note that to minimize  
31  
32 15 social desirability, individual interviews will also be conducted that may provide a  
33  
34 16 deeper understanding of each coordinator's personal experience. Focus groups will be  
35  
36 17 conducted by the first author (HT) and will last 90 minutes.

37  
38  
39  
40  
41  
42 18 **Sociodemographic questionnaire.** Adolescents will complete a  
43  
44 19 sociodemographic questionnaire on their age, gender, country of birth, religion, length  
45  
46 20 of time participating in the program, and number of days a week participating in the  
47  
48 21 program. The sociodemographic questionnaire for parents will include questions about  
49  
50 22 socioeconomic status, marital status, their child's medical history and whether their  
51  
52 23 child takes psychiatric medication.  
53  
54  
55  
56  
57  
58  
59  
60



## 1 **Data Analysis**

2           The qualitative data collected from the interviews and focus groups will be  
3 recorded and transcribed. The primary emphasis of this study is on identifying  
4 themes, commonalities, differences, and patterns across the dataset. Meaning and  
5 experience will be examined at both the semantic and latent levels and best practice  
6 guidelines will be identified from the perspectives of the different stakeholders in the  
7 program.<sup>35 36</sup> To this end, the 6-stage reflexive thematic analysis approach will be  
8 used, which is comprised of familiarization with and immersion in the data, coding of  
9 the data, constructing initial themes, reviewing themes, defining and naming themes,  
10 and writing up the report with illustrative data extracts.<sup>39</sup> This reflexive thematic  
11 analysis procedure will be used within the pragmatic and constructive frameworks.  
12 The checklist for good reflexive thematic analysis will be used as a guide to ensure an  
13 analysis that is rigorous and robust.<sup>40</sup> The data analysis procedure will be conducted  
14 by the first author (HT) and assessed by second author (HO); disagreements will be  
15 resolved by discussion. A qualitative data analysis software (ATLAS.ti v8) will be  
16 used for data management and analysis.

17           To strengthen the validity of the findings, a triangulation procedure will be  
18 conducted with the qualitative data that will be collected by different methods  
19 (individual interviews and focus groups) and from different types of stakeholders in  
20 the program: the program's decision makers, team, intended beneficiaries, and  
21 referring MHP.<sup>36 41</sup>

## 22 **Study Trustworthiness**

23           To strengthen the trustworthiness of the findings in addition to the  
24 triangulation, three strategies will be employed, as suggested in the qualitative  
25 research literature.<sup>41</sup> Memo writing will be used to record decision-making, the

1 process of meaning extraction from the data and subsequent conceptual development,  
2 as well as to facilitate continuous communication within the research team.<sup>42</sup> A  
3 reflexivity journal will be used to gain and maintain self-awareness of the researcher's  
4 perspective and its potential impact on the research process and interpretation of the  
5 findings.<sup>41</sup> To increase the credibility of the research, member checking will be held  
6 (also known as participation validation). In this procedure, the findings will be  
7 presented to the participants who will be asked to respond whether they reflect their  
8 experience, meanings, and perspectives.<sup>41 43</sup> Finally, to enhance the rigor of the study  
9 we will use the 32-item checklist for interviews and focus groups of the Consolidated  
10 Criteria for Reporting Qualitative research (COREQ; see online supplementary file).<sup>44</sup>

### 11 **Patient and Public Involvement**

12 We did not involve patients or the public in our work.

### 13 **Discussion**

14 Recovery-oriented adolescent-centered services in the community are crucial  
15 in the critical developmental period of adolescence, which might be even more  
16 complex for adolescents with MHC and might lead to difficulties in identity  
17 formation.<sup>2</sup> To date, adolescents with MHC in Israel are not eligible for community-  
18 based psychosocial rehabilitation services by law, despite the rising need. Moreover,  
19 there is no centralized database with data on service consumers that is accessible by  
20 the three ministries that provide services for adolescents with MHC in Israel, which  
21 may result in inconsistent continuity of care. Coordination between different services  
22 is crucial for adolescents with MHC who go through multiple service transitions and  
23 are therefore more vulnerable to the risks of discontinuity.<sup>16 30 32 33 45 46</sup>

24 No study has examined a similar community-based psychosocial rehabilitation  
25 program for adolescents with MHC in Israel. The *Amitim for Youth* program will

1  
2  
3 1 serve for a better understanding of the barriers and facilitators related to the  
4  
5 2 infrastructure, implementation, and continuity of care of these services in Israel. The  
6  
7 3 implementation of this type of program can be challenging because of its pioneering  
8  
9 4 nature and its target population: adolescents who do not only face age-related  
10  
11 5 challenges but also have MHC. Thus, recruiting adolescents with MHC to participate  
12  
13 6 in this research might be challenging given their psychiatric condition. Some  
14  
15 7 adolescents might be reluctant to participate out of self-stigma or low motivation  
16  
17 8 whereas others might be eager to participate to share their experiences and express  
18  
19 9 their voice. The findings will provide a best practice model to optimize the operation  
20  
21 10 and implementation by service providers, enhance the service contribution to the  
22  
23 11 consumers (adolescents and their parents) while meeting their needs and goals, and  
24  
25 12 inform policy makers. Specific attention will be paid to addressing the potential  
26  
27 13 barriers and facilitators for effective program implementation. The findings may  
28  
29 14 ultimately serve as a basis for currently under-developed policy recommendations and  
30  
31 15 legislation in the field of adolescent psychiatric rehabilitation.  
32  
33  
34  
35  
36

### 37 **Ethics and dissemination**

38  
39  
40 17 The study in its current design was approved by the Ethics Committee for  
41  
42 18 Human Research in the Faculty of Social Welfare and Health Sciences at the  
43  
44 19 University of Haifa (#455-18), and by the Chief Scientist in the Ministry of Education  
45  
46 20 (#10566). All participants will sign an informed consent form and will be guaranteed  
47  
48 21 confidentiality and anonymity. Adolescents' participation will be obtained by their  
49  
50 22 parents or guardians, which will also be signed by the child. Data collection will be  
51  
52 23 conducted in the next two years (2019-2020). A report in Hebrew will be submitted to  
53  
54 24 the National Insurance Institute. The results will be disseminated in articles that will  
55  
56 25 be written in English as part of a doctoral dissertation.  
57  
58  
59  
60

1 **Authors' contributions:** Both authors contributed equally to the conceptualization  
2 and design of the study. HT (MA, PhD candidate, drama therapist, female) conducted  
3 the literature review that was examined and approved by HO (PhD, researcher, male).

4 Both authors read and approved the final manuscript.

5 **Funding:** The study is funded by the Israeli National Insurance Institute (grant#  
6 16343).

7 **Competing interests:** The authors declare that they have no competing interests. The  
8 funding body will have no role in data collection, analysis, interpretation, or  
9 publications.

10 **Consent for publication:** Not applicable.

11 **Word count:** 3641

## References

1. Orkibi H, Ronen T. A dual-pathway model linking self-control skills to aggression in adolescents: Happiness and time perspective as mediators. *Journal of Happiness Studies* 2019;20(3):729-42. doi: 10.1007/s10902-018-9967-1
2. Steinberg LD. *Adolescence*. 11th ed. New York, NY: McGraw-Hill 2017.
3. Erikson EH. *Identity: Youth and crisis*. New York, NY: W. W. Norton 1968.
4. Dwivedi K, Harper P. *Promoting emotional well-being of children and adolescents and preventing their mental ill health a handbook*. London, UK: Jessica Kingsley 2004.
5. Corrigan PW, Watson AC. The paradox of self-stigma and mental illness. *Clinical Psychology: Science and Practice* 2002;9(1):35-53. doi: 10.1093/clipsy.9.1.35
6. Martínez-Hidalgo MN, Lorenzo-Sánchez E, García JLL, et al. Social contact as a strategy for self-stigma reduction in young adults and adolescents with mental health problems. *Psychiatry Research* 2018;260:443-50. doi: <https://doi.org/10.1016/j.psychres.2017.12.017>
7. Mulfinger N, Müller S, Böge I, et al. Honest, open, proud for adolescents with mental illness: Pilot randomized controlled trial. *Journal of Child Psychology and Psychiatry* 2018;59(6):684-91. doi: <https://doi.org/10.1111/jcpp.12853>
8. Kaushik A, Kostaki E, Kyriakopoulos M. The stigma of mental illness in children and adolescents: A systematic review. *Psychiatry Research* 2016;243:469-94. doi: <https://doi.org/10.1016/j.psychres.2016.04.042>
9. Rose AL, Atkey SK, Goldberg JO. Self-stigma in youth: Prevention, intervention, and the relevance for schools. In: Leschied AW, Saklofske DH, Flett GL, eds. *Handbook of school-based mental health promotion: An evidence-informed framework for implementation*. Cham, Switzerland: Springer 2018:213-35.

- 1  
2  
3 10. Leschied AW, Saklofske DH, Flett GL. Handbook of school-based mental health  
4  
5 promotion: An evidence-informed framework for implementation. Cham,  
6  
7 Switzerland: Springer 2018.  
8  
9  
10 11. Hartman LI, Michel NM, Winter A, et al. Self-stigma of mental illness in high  
11  
12 school youth. *Canadian Journal of School Psychology* 2013;28(1):28-42. doi:  
13  
14 10.1177/0829573512468846  
15  
16  
17 12. Kranke D, Floersch J, Townsend L, et al. Stigma experience among adolescents  
18  
19 taking psychiatric medication. *Children and Youth Services Review*  
20  
21 2010;32(4):496-505. doi: <https://doi.org/10.1016/j.childyouth.2009.11.002>  
22  
23  
24 13. Moses T. Coping strategies and self-stigma among adolescents discharged from  
25  
26 psychiatric hospitalization: A 6-month follow-up study. *International Journal*  
27  
28 *of Social Psychiatry* 2015;61(2):188-97. doi: 10.1177/0020764014540146  
29  
30  
31 14. Mulfinger N, Rüsç N, Bayha P, et al. Secrecy versus disclosure of mental illness  
32  
33 among adolescents: I. The perspective of adolescents with mental illness.  
34  
35 *Journal of Mental Health* 2019;28(3):296-303. doi:  
36  
37 10.1080/09638237.2018.1487535  
38  
39  
40 15. Mulfinger N, Rüsç N, Bayha P, et al. Secrecy versus disclosure of mental illness  
41  
42 among adolescents: II. The perspective of relevant stakeholders. *Journal of*  
43  
44 *Mental Health* 2019;28(3):304-11. doi: 10.1080/09638237.2018.1487537  
45  
46  
47 16. Polanczyk GV, Salum GA, Sugaya LS, et al. Annual research review: A meta-  
48  
49 analysis of the worldwide prevalence of mental disorders in children and  
50  
51 adolescents. *The Journal of Child Psychology and Psychiatry* 2015;56(3):345-  
52  
53 65. doi: <https://doi.org/10.1111/jcpp.12381> [published Online First:  
54  
55 2015/02/05]  
56  
57  
58  
59  
60

- 1  
2  
3 17. Israel National Council for the Child. Israel national council for the child,  
4  
5 statistical abstract "children in Israel 2017" 2017 [Data Collection]. Available  
6  
7 from: <https://www.children.org.il/>  
8  
9
- 10 18. The Knesset. Proposed Rights and Services for Children and Youth with Mental  
11  
12 Disorders Law, 5766 - 2016. (P / 2783/20) 2019 [Available from:  
13  
14 [http://fs.knesset.gov.il//20/law/20\\_lst\\_323138.docx](http://fs.knesset.gov.il//20/law/20_lst_323138.docx).  
15  
16
- 17 19. UN High Commissioner for Human Rights. Mental health and human rights:  
18  
19 report of the United Nations High Commissioner for Human Rights 2017  
20  
21 [Available from: <https://digitallibrary.un.org/record/861008>.  
22  
23
- 24 20. Rabinowitz M. Children in israel: Selected issues regarding rights, needs and  
25  
26 services. Israel: The Committee on the Rights of the Child, 20th Knesset. 2015  
27  
28
- 29 21. Joyce AS, Wild TC, Adair CE, et al. Continuity of care in mental health services:  
30  
31 Toward clarifying the construct. *The Canadian Journal of Psychiatry*  
32  
33 2004;49(8):539-50. doi: 10.1177/070674370404900805 [published Online  
34  
35 First: 2004/09/30]  
36  
37
- 38 22. Anthony WA. Recovery from mental illness: The guiding vision of the mental  
39  
40 health service system in the 1990s. *Psychosocial Rehabilitation Journal*  
41  
42 1993;16(4):11-23. doi: 10.1037/h0095655  
43  
44
- 45 23. Davidson L. The recovery movement: Implications for mental health care and  
46  
47 enabling people to participate fully in life. *Health Aff (Millwood)*  
48  
49 2016;35(6):1091-7. doi: 10.1377/hlthaff.2016.0153 [published Online First:  
50  
51 2016/06/09]  
52  
53
- 54 24. Schrank B, Slade M. Recovery in psychiatry. *Psychiatric Bulletin*  
55  
56 2018;31(09):321-25. doi: 10.1192/pb.bp.106.013425 [published Online First:  
57  
58 2018/01/02]  
59  
60

- 1  
2  
3 1 25. Slade M. Personal recovery and mental illness: A guide for mental health  
4  
5 2 professionals. Cambridge: Cambridge University Press 2009.  
6  
7  
8 3 26. Aviram U, Ginath Y, Roe D. Mental health reforms in europe: Israel's  
9  
10 4 rehabilitation in the community of persons with mental disabilities law:  
11  
12 5 Challenges and opportunities. *Psychiatric Services* 2012;63(2):110-12. doi:  
13  
14 6 10.1176/appi.ps.201100009 [published Online First: 2012/02/04]  
15  
16  
17 7 27. Hughes F, Hebel L, Badcock P, et al. Ten guiding principles for youth mental  
18  
19 8 health services. *Early Intervention in Psychiatry* 2018;12(3):513-19. doi:  
20  
21 9 10.1111/eip.12429 [published Online First: 2017/04/13]  
22  
23  
24 10 28. McMahon J, Ryan F, Cannon M, et al. Where next for youth mental health  
25  
26 11 services in Ireland? *Irish Journal of Psychological Medicine* 2018:1-5.  
27  
28 12 Advance online publication. doi: <https://doi.org/10.1017/ipm.2018.12>  
29  
30  
31 13 29. Rickwood D, Paraskakis M, Quin D, et al. Australia's innovation in youth mental  
32  
33 14 health care: The headspace centre model. *Early intervention in psychiatry*  
34  
35 15 2019;13(1):159-66. doi: <https://doi.org/10.1111/eip.12740>  
36  
37  
38 16 30. Patel V, Flisher AJ, Hetrick S, et al. Mental health of young people: a global  
39  
40 17 public-health challenge. *The Lancet* 2007;369(9569):1302-13. doi:  
41  
42 18 [https://doi.org/10.1016/S0140-6736\(07\)60368-7](https://doi.org/10.1016/S0140-6736(07)60368-7)  
43  
44  
45 19 31. Kohrt B, Asher L, Bhardwaj A, et al. The role of communities in mental health  
46  
47 20 care in low-and middle-income countries: A meta-review of components and  
48  
49 21 competencies. *International Journal of Environmental Research Public Health*  
50  
51 22 2018;15(6):1-31. doi: 10.3390/ijerph15061279  
52  
53  
54 23 32. Malla A, Iyer S, Shah J, et al. Canadian response to need for transformation of  
55  
56 24 youth mental health services: ACCESS Open Minds (Esprits ouverts). *Early*  
57  
58  
59  
60



- 1  
2  
3  
4 1 *Intervention in Psychiatry* 2018 doi: 10.1111/eip.12772 [published Online  
5  
6 2 First: 2018/12/18]  
7  
8 3 33. Cleverley K, Rowland E, Bennett K, et al. Identifying core components and  
9  
10 4 indicators of successful transitions from child to adult mental health services:  
11  
12 5 A scoping review. *European Child & Adolescent Psychiatry* 2018:1-15.  
13  
14 6 Advance online publication. doi: <https://doi.org/10.1007/s00787-018-1213-1>  
15  
16  
17 7 34. Mertens DM, Wilson AT. Program evaluation theory and practice. 2nd ed. New  
18  
19 8 York, NY: Guilford Press 2018.  
20  
21 9 35. Patton MQ. Qualitative research & evaluation methods: Integrating theory and  
22  
23 10 practice. 4th ed. Thousand Oaks, CA: SAGE 2015.  
24  
25  
26 11 36. Creswell JW, Clark VLP. Designing and conducting mixed methods research. 3th  
27  
28 12 ed. Los angeles, CA: Sage 2017.  
29  
30  
31 13 37. Kvale S, Brinkmann S. Interviews: Learning the craft of qualitative research  
32  
33 14 interviewing. Thousand Oaks, CA: Sage 2009.  
34  
35  
36 15 38. Bloor M. Focus groups in social research. Thousand Oaks, CA: SAGE 2001.  
37  
38 16 39. Braun V, Clarke V, Hayfield N, et al. Thematic analysis. In: Liamputtong P, ed.  
39  
40 17 Handbook of research methods in health social sciences. Singapore: Springer  
41  
42 18 Singapore 2019:843-60.  
43  
44  
45 19 40. Terry G, Hayfield N, Clarke V, et al. Thematic analysis. In: Willig C, Rogers WS,  
46  
47 20 eds. The SAGE handbook of qualitative research in psychology. London, UK:  
48  
49 21 SAGE 2017:17-37.  
50  
51  
52 22 41. Shenton AK. Strategies for ensuring trustworthiness in qualitative research  
53  
54 23 projects. *Education for Information* 2004;22(2):63-75. doi: 10.3233/EFI-2004-  
55  
56 24 22201  
57  
58  
59  
60

- 1  
2  
3 1 42. Birks M, Chapman Y, Francis K. Memoing in qualitative research: Probing data  
4  
5 2 and processes. *Journal of Research in Nursing* 2008;13(1):68-75. doi:  
6  
7 3 10.1177/1744987107081254  
8  
9  
10 4 43. Foster A. A nonlinear model of information-seeking behavior. *Journal of the*  
11  
12 5 *American Society for Information Science and Technology* 2004;55(3):228-37.  
13  
14 6 doi: 10.1002/asi.10359  
15  
16  
17 7 44. Tong A, Sainsbury P, Craig J. Consolidated criteria for reporting qualitative  
18  
19 8 research (COREQ): a 32-item checklist for interviews and focus groups. *Int J*  
20  
21 9 *Qual Health Care* 2007;19(6):349-57. doi: 10.1093/intqhc/mzm042 [published  
22  
23 10 Online First: 2007/09/18]  
24  
25  
26 11 45. Tobon JI, Reid GJ, Brown JB. Continuity of care in children's mental health:  
27  
28 12 parent, youth and provider perspectives. *Community Mental Health Journal*  
29  
30 13 2015;51(8):921-30. doi: <https://doi.org/10.1007/s10597-015-9873-5>  
31  
32  
33 14 46. Paul M, Street C, Wheeler N, et al. Transition to adult services for young people  
34  
35 15 with mental health needs: A systematic review. *Clinical Child Psychology and*  
36  
37 16 *Psychiatry* 2015;20(3):436-57. doi:  
38  
39 17 <https://doi.org/10.1177/1359104514526603>  
40  
41  
42  
43 18  
44  
45  
46 19  
47  
48  
49 20  
50  
51  
52  
53  
54  
55  
56  
57  
58  
59  
60

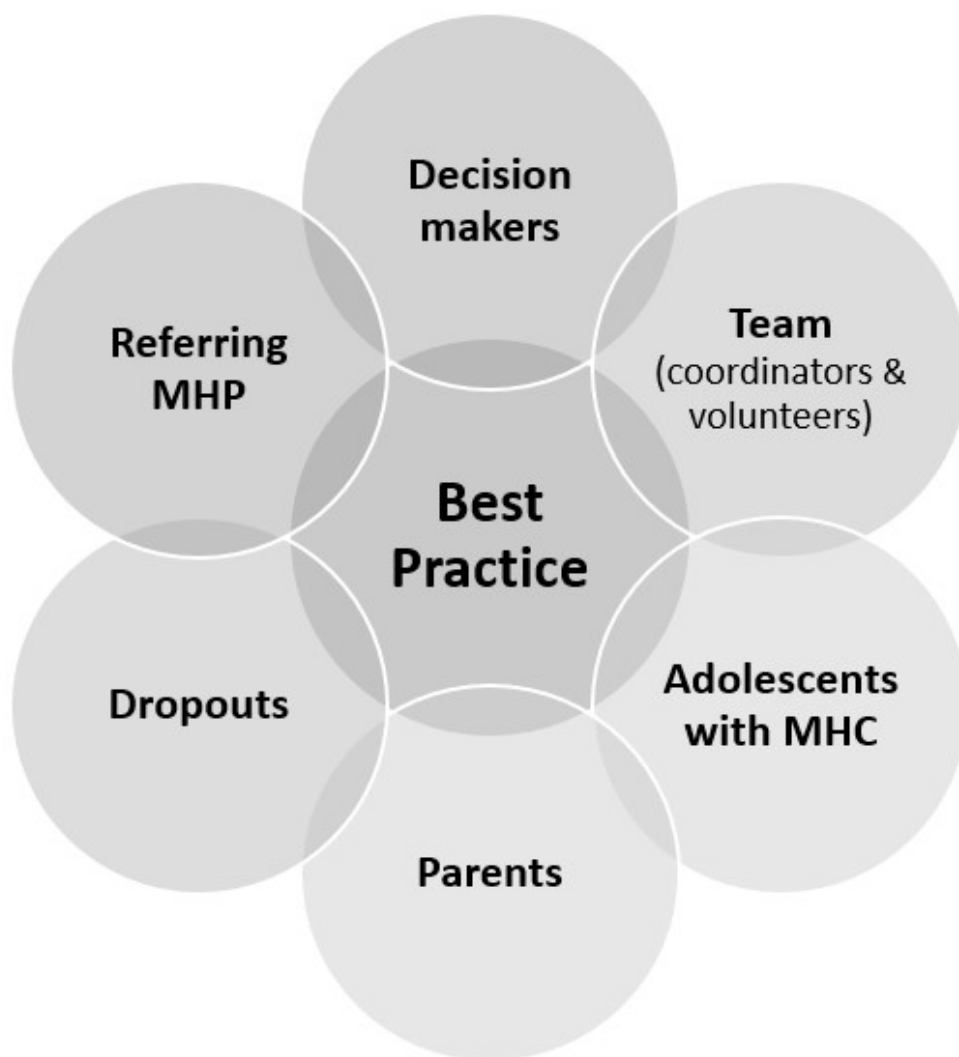

Figure 1. Six groups of participants in the study

## COREQ- Consolidated criteria for reporting qualitative research: a 32-item checklist for interviews and focus groups

Tuaf, H. & Orkibi, H. (2019). A community-based rehabilitation program for youth with mental health conditions in Israel: A qualitative study protocol.

| Section/Topic                                  | Item # | Checklist item                                                                                                                                           | Reported on page # |
|------------------------------------------------|--------|----------------------------------------------------------------------------------------------------------------------------------------------------------|--------------------|
| <b>Domain 1: Research team and reflexivity</b> |        |                                                                                                                                                          |                    |
| <b>Personal characteristics</b>                |        |                                                                                                                                                          |                    |
| Interviewer/facilitator                        | 1      | Which author/s conducted the interview or focus group?                                                                                                   | 13                 |
| Credentials                                    | 2      | What were the researcher's credentials? E.g. PhD, MD                                                                                                     | 17                 |
| Occupation                                     | 3      | What was their occupation at the time of the study?                                                                                                      | 17                 |
| Gender                                         | 4      | Was the researcher male or female?                                                                                                                       | 17                 |
| Experience and training                        | 5      | What experience or training did the researcher have?                                                                                                     | 17                 |
| <b>Relationship with participants</b>          |        |                                                                                                                                                          |                    |
| Relationship established                       | 6      | Was a relationship established prior to study commencement?                                                                                              | 11                 |
| Participant knowledge of the interviewer       | 7      | What did the participants know about the researcher? e.g. personal goals, reasons for doing the research                                                 | 17                 |
| Interviewer characteristics                    | 8      | What characteristics were reported about the interviewer/facilitator? e.g. Bias, assumptions, reasons and interests in the research topic                | 17                 |
| <b>Domain 2: Study design</b>                  |        |                                                                                                                                                          |                    |
| <b>Theoretical framework</b>                   |        |                                                                                                                                                          |                    |
| Methodological orientation and Theory          | 9      | What methodological orientation was stated to underpin the study? e.g. grounded theory, discourse analysis, ethnography, phenomenology, content analysis | 10,14-15           |
| <b>Participant selection</b>                   |        |                                                                                                                                                          |                    |
| Sampling                                       | 10     | How were participants selected? e.g. purposive, convenience, consecutive, snowball                                                                       | 11                 |
| Method of approach                             | 11     | How were participants approached? e.g. face-to-face, telephone, mail, email                                                                              | 11                 |
| Sample size                                    | 12     | How many participants were in the study?                                                                                                                 | N/A                |
| Non-participation                              | 13     | How many people refused to participate or dropped out? Reasons?                                                                                          | N/A                |
| Setting of data collection                     | 14     | Where was the data collected? e.g. home, clinic, workplace                                                                                               | 11                 |
| Presence of non-participants                   | 15     | Was anyone else present besides the participants and researchers?                                                                                        | 11-13,17           |
| Description of sample                          | 16     | What are the important characteristics of the sample? e.g. demographic data, date                                                                        | 13,16              |
| <b>Data collection</b>                         |        |                                                                                                                                                          |                    |
| Interview guide                                | 17     | Were questions, prompts, guides provided by the authors? Was it pilot tested?                                                                            | 12-13              |
| Repeat interviews                              | 18     | Were repeat interviews carried out? If yes, how many?                                                                                                    | N/A                |
| Audio/visual recording                         | 19     | Did the research use audio or visual recording to collect the data?                                                                                      | 14                 |
| Field notes                                    | 20     | Were field notes made during and/or after the interview or focus group?                                                                                  | 14-15              |
| Duration                                       | 21     | What was the duration of the interviews or focus group?                                                                                                  | 13                 |
| Data saturation                                | 22     | Was data saturation discussed?                                                                                                                           | 11                 |

## COREQ- Consolidated criteria for reporting qualitative research: a 32-item checklist for interviews and focus groups

| Section/Topic                          | Item # | Checklist item                                                                                                                    | Reported on page # |
|----------------------------------------|--------|-----------------------------------------------------------------------------------------------------------------------------------|--------------------|
| Transcripts returned                   | 23     | Were transcripts returned to participants for comment and/or correction?                                                          | 15                 |
| <b>Domain 3: Analysis and findings</b> |        |                                                                                                                                   |                    |
| <b>Data analysis</b>                   |        |                                                                                                                                   |                    |
| Number of data coders                  | 24     | How many data coders coded the data?                                                                                              | 15                 |
| Description of the coding tree         | 25     | Did authors provide a description of the coding tree?                                                                             | N/A                |
| Derivation of themes                   | 26     | Were themes identified in advance or derived from the data?                                                                       | 10, 14-15          |
| Software                               | 27     | What software, if applicable, was used to manage the data?                                                                        | 14                 |
| Participant checking                   | 28     | Did participants provide feedback on the findings?                                                                                | 15                 |
| <b>Reporting</b>                       |        |                                                                                                                                   |                    |
| Quotations presented                   | 29     | Were participant quotations presented to illustrate the themes / findings? Was each quotation identified? e.g. participant number | N/A                |
| Data and findings consistent           | 30     | Was there consistency between the data presented and the findings?                                                                | N/A                |
| Clarity of major themes                | 31     | Were major themes clearly presented in the findings?                                                                              | N/A                |
| Clarity of minor themes                | 32     | Is there a description of diverse cases or discussion of minor themes?                                                            | N/A                |

**Note:** The checklist consists of items that should be included in reports on a qualitative study that has been completed. N/A = item not applicable to the current protocol of a study in the participant recruitment phase. Page numbers refer to those in the Word document submitted to the journal for peer review.

### Checklist reference:

Tong A, Sainsbury P, Craig J. Consolidated criteria for reporting qualitative research (COREQ): a 32-item checklist for interviews and focus groups. *International Journal for Quality in Health Care*. 2007; 19(6): 349-357.

# BMJ Open

## **A community-based rehabilitation program for adolescents with mental health conditions in Israel: a qualitative study protocol**

|                                 |                                                                                                                                           |
|---------------------------------|-------------------------------------------------------------------------------------------------------------------------------------------|
| Journal:                        | <i>BMJ Open</i>                                                                                                                           |
| Manuscript ID                   | bmjopen-2019-032809.R2                                                                                                                    |
| Article Type:                   | Protocol                                                                                                                                  |
| Date Submitted by the Author:   | 27-Nov-2019                                                                                                                               |
| Complete List of Authors:       | Tuaf, Hila; University of Haifa, School of Creative Arts Therapies<br>Orkibi, Hod; University of Haifa, School of Creative Arts Therapies |
| <b>Primary Subject Heading</b>: | Mental health                                                                                                                             |
| Secondary Subject Heading:      | Qualitative research                                                                                                                      |
| Keywords:                       | MENTAL HEALTH, QUALITATIVE RESEARCH, Child & adolescent psychiatry < PSYCHIATRY                                                           |
|                                 |                                                                                                                                           |

SCHOLARONE™  
Manuscripts

1  
2  
3 1  
4

5 2 A community-based rehabilitation program for adolescents with mental health  
6  
7 3 conditions in Israel: a qualitative study protocol  
8  
9

10 4

11 5 Hila Tuaf<sup>1</sup> and Hod Orkibi<sup>1</sup>  
12  
13  
14

15 6

16  
17 7 <sup>1</sup> School of Creative Arts Therapies, Faculty of Social Welfare and Health Sciences,  
18  
19 8 University of Haifa, Israel  
20  
21

22 9

23 10

24  
25  
26 11 Corresponding author: H. Orkibi, University of Haifa,  
27  
28 12 199 Aba Khoushy Av., Mount Carmel, Haifa 3498838, Israel  
29

30 13 [horkibi@univ.haifa.ac.il](mailto:horkibi@univ.haifa.ac.il)  
3132 14 Cell: +972544393621  
33  
3435 15 ORCID ID: <https://orcid.org/0000-0003-1498-7953>  
36  
37

38 16

39 17

40 18 Word count: 3646  
41  
4243 19  
44  
4546 20  
47  
4849 21  
5051 22  
5253 23  
5455 24  
5657 25  
58  
59  
60

1  
2  
3 **1 Abstract**  
4

5 **2 Introduction:** In Israel, 12% of adolescents have mental health conditions.  
6  
7  
8 3 Approximately 600 adolescents with mental health conditions are hospitalized each  
9  
10 4 year and about 40% of them return to the hospital and are thus cut off from their daily  
11  
12 5 lives and peers in the community. In contrast to adults, adolescents with mental health  
13  
14 6 conditions in Israel are not eligible by law for rehabilitation services. Thus, the  
15  
16 7 overarching goal of this qualitative study is to identify best practices for the  
17  
18 8 implementation of community-based psychosocial rehabilitation programs for this  
19  
20 9 population, by examining the first such program in Israel. *Amitim for Youth*, which  
21  
22 10 was established in 2018 by the Israel Association of Community Centers in  
23  
24 11 cooperation with the Ministry of Health, the Ministry of Education, and the Special  
25  
26 12 Projects Fund of the National Insurance Institute.  
27  
28  
29

30 **13 Methods and analysis:** Qualitative data will be collected through in-depth semi-  
31  
32 14 structured interviews and focus groups. To identify themes and patterns in the data, a  
33  
34 15 6-stage reflexive thematic analysis approach will be used. A triangulation procedure  
35  
36 16 will be conducted to strengthen the validity of the findings collected by different  
37  
38 17 methods and from various stakeholders in the program: the program's decision  
39  
40 18 makers, program team members, the intended beneficiaries and referring mental  
41  
42 19 health professionals. To insure the trustworthiness of the findings, three strategies will  
43  
44 20 be employed: memo writing, reflexive journaling, and member checking.  
45  
46  
47  
48

49 **21 Ethics and dissemination:** This study was approved by the Ethics Committee for  
50  
51 22 Human Research in the Faculty of Social Welfare and Health Sciences at the  
52  
53 23 University of Haifa (#455-18) and by the Chief Scientist in the Ministry of Education  
54  
55 24 (#10566). All participants will sign an informed consent form and will be guaranteed  
56  
57  
58  
59  
60



1 confidentiality and anonymity. Data collection will be conducted in the next two years  
2 (2019-2020). After data analysis, the findings will be disseminated via publications.

### 3 **Strengths and limitations of this study**

- 4 • This is a pioneering study that will examine a community-based psychosocial  
5 rehabilitation program for adolescents with mental health conditions in Israel.
- 6 • The findings will inform best practices to meet the needs of all stakeholders by  
7 addressing potential barriers and facilitators for program implementation.
- 8 • The findings may contribute to policy recommendations and legislation relating to  
9 adolescent psychiatric rehabilitation.
- 10 • Recruiting adolescents with mental health conditions may be challenging due to  
11 their psychiatric condition.

12  
13 **Keywords:** adolescents, youth, psychiatric rehabilitation, mental illness, mental  
14 health, recovery, community.

### 15 16 17 18 19 20 21 22 23 24 25 **Introduction**

## 1 **Adolescents with Mental Health Conditions (MHC)**

2 Adolescence is characterized by physiological, psychological and social  
3 changes that are known to be associated with many challenges.<sup>1,2</sup> According to  
4 Erikson's psychosocial developmental theory,<sup>3</sup> adolescents are in the “identity versus  
5 role confusion” stage, where they search for personal identity and strive for  
6 independence through the exploration of social roles, personal values, beliefs and  
7 goals while distancing themselves from their parents. For adolescents with MHC (i.e.,  
8 who have a psychiatric diagnosis), this developmental task is even more complex and  
9 may lead to a lack of identity formation or a negative identity.<sup>2</sup> Adolescents with  
10 MHC may also have to deal with maladaptive thoughts, dysregulated emotions and  
11 behaviors which may impact their interaction with peers and family members,  
12 academic performance, and in severe cases may involve loss of contact with reality.<sup>4</sup>  
13 Therefore, it is important to differentiate between the needs of adolescents who face  
14 age-appropriate challenges and adolescents who have MHC.

15 Another challenge that adolescents with MHC may face is coping with stigma.  
16 The mental health literature distinguishes between public stigma and self-stigma.<sup>5</sup>  
17 Public stigma refers to negative labeling (stereotype, prejudice and discrimination) of  
18 a group of people to distance them from society, whereas self-stigma (also termed  
19 internalized stigma) refers to the internalization of those negative labels in a way that  
20 changes people's self-perception.<sup>5</sup> While there is ample evidence that adolescents  
21 with MHC experience public stigma,<sup>6,7</sup> self-stigma is under-investigated and  
22 insufficiently understood for adolescents with MHC.<sup>8-10</sup> In some studies adolescents'  
23 self-stigma has been associated with reduced self-esteem,<sup>11</sup> limited social interactions,  
24 secrecy, shame,<sup>12</sup> and less adaptive coping strategies.<sup>13</sup> Recent qualitative findings  
25 suggest that adolescents' decisions to disclose their MHC is highly influenced by fear

1  
2  
3 1 of stigma.<sup>14 15</sup> A worldwide meta-analysis study reported that 13% of all adolescents  
4  
5 2 have MHC.<sup>16</sup> In Israel, from 1993 to 2016, there was an increase of 130% in the  
6  
7 3 number of children and adolescents who were admitted to psychiatric hospitals. In  
8  
9 4 2016, 767 adolescents aged 12 to 17 were admitted to Israeli hospitals.<sup>17</sup>

10  
11  
12 5 A legislative bill entitled “Rights and Services for Children and Adolescents  
13  
14 6 with Mental Difficulties” was submitted to the Israeli Knesset for the first time in  
15  
16 7 2014.<sup>18</sup> The purpose of the bill was to:

17  
18  
19 8 .... ensure the rights of children and adolescents with mental disabilities  
20  
21 9 to rehabilitation and care in the community, in such a way as to provide  
22  
23 10 an appropriate response to their special needs and enable them to  
24  
25 11 integrate into the community as their peers do, while utilizing their  
26  
27 12 abilities to the fullest.

28  
29  
30  
31 13 The bill stressed that children and adolescents must be provided with services in the  
32  
33 14 community, including leisure activities, care and guidance by counselors from the  
34  
35 15 field of mental health, and include the provision of information, practical and  
36  
37 16 emotional support, and assistance in imparting life and social skills.<sup>18</sup> However, this  
38  
39 17 bill has not been passed and adolescents with MHC in Israel thus remain without  
40  
41 18 legislated, State supported rehabilitative psychosocial services in the community.

42  
43  
44 19 Aligned with the recovery approach described below, the widely used  
45  
46 20 umbrella term “mental health conditions” (rather than mental illness or psychiatric  
47  
48 21 disorders or disability) was adopted, which is consistent with the United Nations  
49  
50 22 General Assembly 2017 report on Mental Health and Human Rights.<sup>19</sup>

51  
52  
53 23

54  
55  
56 24

57  
58 25 **Services for Adolescents with MHC in Israel**

1 Services for adolescents with MHC are different than those for adults, given  
2 their needs and because the “Rehabilitation in the Community of Persons with Mental  
3 Disabilities Law of 2000” applies only to adults aged 18 and over.<sup>20</sup> In Israel, there  
4 are three main ministries that provide services to children and adolescents with MHC.  
5 The Ministry of Health is responsible for the medical treatment provided by mental  
6 health clinics and in psychiatric hospitals. The Ministry of Labor, Social Affairs and  
7 Social Services is responsible for out-of-home care (post-hospitalization boarding  
8 schools). The Ministry of Education is responsible for educational services within the  
9 school system (providing personalized educational and psychological services), home-  
10 schooling and in out-of-home settings. However, the division of responsibility across  
11 the ministries is unclear and coordination is poor. Particularly problematic is that there  
12 is no centralized database with data on service consumers across the three ministries  
13 in Israel that provide services for adolescents with MHC. This may lead to  
14 inconsistent continuity of care, in terms of how mental health consumers perceive and  
15 experience their care services as connected and coherent, for example between  
16 hospital and community services.<sup>21</sup>

### 17 **The Recovery Approach**

18 For many years, the medical approach in the Westernized mental health  
19 system has been dominant. It views people with MHC as “patients” who should be  
20 hospitalized for prolonged periods to reduce their symptoms.<sup>22</sup> By contrast, in recent  
21 decades, the rehabilitation policy of mental health systems has been influenced by the  
22 Personal Recovery Approach which is based on the “person-centered” principle.<sup>23</sup>  
23 This approach focuses on integration into the community, improving quality of life,  
24 restoring a sense of control, autonomy, choice, meaning, independence as well as  
25 responsibility and hope despite the person's symptoms.<sup>22 23</sup> Accordingly, personal

1 recovery is not measured in terms of a reduction in symptoms or by a return to the  
2 state prior to the mental crisis, but rather by the ability to rebuild a personal identity  
3 and live a meaningful life with satisfying social roles and a sense of inclusion in the  
4 community.<sup>24 25</sup>

5 In Israel, the transition from the medical approach to the recovery approach  
6 has been reflected in several significant changes in the attitude of the State and society  
7 towards people with MHC. One of the main changes involved the enactment of the  
8 “Rehabilitation in the Community of Persons with Mental Disabilities Law of 2000”  
9 that provides a package of rehabilitation services to adults with MHC with a  
10 significant dysfunction in their life and who are eligible for these services according  
11 to criteria determined by law.<sup>26</sup> This law has contributed to increased integration of  
12 these individuals in the community which also has reduced prolonged hospitalization  
13 and residence in institutions.<sup>26</sup> Changes in the attitude of the State and society to  
14 people with MHC has led to initiatives to establish a variety of programs for  
15 community-based rehabilitation. One of these programs is the *Amitim* program for  
16 adults. The program was established at 2001, to comply with the abovementioned law  
17 for the inclusion of adults (aged 18+) with at least a 40% mental health disability as  
18 determined by the National Insurance Institute.<sup>1</sup> The *Amitim* program is the outcome  
19 of cooperation between the Ministry of Health and the Israel Association of  
20 Community Centers and operates currently in 77 community centers across the  
21 country. It currently serves approximately 3000 adults with MHC.

---

<sup>1</sup> The National Insurance Institute in Israel (NII) determines the disability level (from 0–100%) under the provisions of clauses 33 or 34 of the appendix to the NII Regulations for Determining the Level of Disability. For instance, a 40% mental health disability refers to a person in a post-psychotic condition with significant signs of impairment, limitation of work capacity, and significant disruption of behavioral, mental, and social functioning. See:  
[https://www.health.gov.il/English/Topics/Mental\\_Health/rehabilitation/Pages/sal.aspx](https://www.health.gov.il/English/Topics/Mental_Health/rehabilitation/Pages/sal.aspx)

1           The literature on the recovery approach highlights the importance for services  
2 to consider adolescents' developmental needs for independence, self-determination,  
3 and self-efficacy when implementing a recovery-oriented adolescent-centered  
4 approach.<sup>27-29</sup> This approach, which encourages them to express their needs and  
5 opinions about the services and engage actively in their rehabilitation process,<sup>27 28 30-33</sup>  
6 was adopted by the *Amitim for Youth* program.

### 7 **Amitim for Youth**

8           In January 2018, a pioneering *Amitim for Youth* program was launched by the  
9 Israel Association of Community Centers in cooperation with the Ministry of Health,  
10 the Ministry of Education, and the Special Projects Fund of the National Insurance  
11 Institute. An inter-ministerial steering committee that consisted of representatives  
12 from each of these stakeholders was involved in the founding of the program and its  
13 initial implementation. The program provides a response to the absence of  
14 community-based psychosocial rehabilitation services for adolescents' after-school  
15 leisure time. The program consumers are adolescents (aged 12-18) who have a  
16 psychiatric diagnosis and are identified in the education system as those with "code  
17 57". The program pilot was gradually implemented in six geographic districts near  
18 psychiatric hospitals which have a child and adolescent department (Haifa and Beer-  
19 Sheva), and near special education schools for children with MHC (Rehovot,  
20 Netanya, Petah-Tikva and Carmiel). In each district, there is a coordinator who  
21 provides services to approximately 20 adolescents in the local community centers.  
22 Each adolescent in the program is provided with a stipend (1,200 Israeli shekels per  
23 year) for participation in leisure and arts activities in the community. The goals of  
24 *Amitim for Youth* relate to three dimensions: adolescents, their family, and the wider  
25 community. For adolescents, the goals are to foster socialization and a sense of

1 belonging to the community, the ability to cope with self-stigma, prevention of  
2 repeated hospitalizations and shorter hospitalization duration, return to age-  
3 appropriate functioning according to personal goals, and finding a meaningful activity  
4 that will lead to satisfaction and self-actualization. Another goal of the program is to  
5 provide support to the adolescents' family members (particularly parents), which is  
6 facilitated by the program's coordinator in each district. Finally, the goal for members  
7 of the community at large is to change attitudes towards adolescents with MHC by  
8 raising awareness.

9         The overarching goal of this study is to identify best practices for the  
10 implementation of a community-based psychosocial rehabilitation program for  
11 adolescents with MHC. More specifically, the study will: (1) identify barriers and  
12 facilitators for the implementation of adolescents psychosocial rehabilitation in the  
13 community, (2) characterize the continuity of care, or lack thereof, between the  
14 referring mental health professionals (MHP) and the program; (3) identify the needs  
15 of adolescents and their parents, program team, and referring MHP; (4) assess the  
16 satisfaction of adolescents and their parents with the overall program and its  
17 components; (5) characterize the services in the program and their value according to  
18 adolescents.

### 19 **Research Questions**

20         The following research questions will be explored. They relate to  
21 infrastructure, implementation, and continuity of care.

22 **Program infrastructure:** (1) What characterizes the referral procedure for the  
23 *Amitim for Youth* program, and what are the barriers and facilitators factors? (2) What  
24 are the characteristics of the adolescents who participate in the program? (3) What is  
25 the demand for the various components offered by the program (including the arts)?

1  
2  
3 1 What services are offered to the participants and how do they perceive them? What  
4  
5 2 services are missing from the participants' perspective?  
6

7  
8 3 **Program implementation:** (4) How is the program implementation experienced by  
9  
10 4 the stakeholders? (5) What are the barriers and facilitators factors for program  
11  
12 5 implementation according to the adolescents themselves (participants and those who  
13  
14 6 withdrew), parents, program team members, and referring MHP? (6) What best  
15  
16 7 practices emerge from the perspectives of all involved?  
17  
18

19 8 **Continuity of care:** (7) What characterizes the relationship between the referring  
20  
21 9 MHP and the program team in the community? (8) What best practices can be  
22  
23 10 identified from the interface between referring MHP and community-based services  
24  
25 11 according to the actors involved?  
26  
27

## 28 12 **Methods and Analysis**

29  
30  
31 13 This qualitative study is situated between the pragmatic and constructivist  
32  
33 14 paradigms.<sup>34</sup> The pragmatic paradigm “focuses primarily on data that are found to be  
34  
35 15 useful for stakeholders”.<sup>34</sup> It has been defined as a real-world practice-oriented  
36  
37 16 framework that focuses on useful applications (“what works”) and practical solutions  
38  
39 17 to problems, to gather information and insights on what is relevant to the  
40  
41 18 stakeholders.<sup>35 36</sup> The constructivist paradigm “focuses primarily on identifying  
42  
43 19 multiple values and perspectives”.<sup>34</sup> Accordingly, a close interaction with the  
44  
45 20 stakeholders will be established to better understand their experiences, by taking the  
46  
47 21 multiple perceptions of the different stakeholders of the program into consideration.<sup>34</sup>  
48  
49

50  
51 22 <sup>35</sup> The two paradigms complement one another, given that their boundaries are  
52  
53 23 permeable.<sup>34</sup>  
54  
55

56 24

57  
58 25  
59  
60



## 1 **Participants**

2 As can be seen in Figure 1, the participants in this study will be composed of  
3 the following six groups of stakeholders: (1) the program decision makers, who  
4 include the program commissioners and funders from different ministries, who are  
5 members of the program's inter-ministerial steering committee; (2) the program team  
6 members, which includes coordinators and volunteers; (3) the intended beneficiaries  
7 of the program; namely, adolescents enrolled in the *Amitim for Youth* program for at  
8 least three months; (4) parents of these adolescents; (5) adolescents who withdrew  
9 from the program, and (6) referring MHP from clinics, hospitals, and schools. Each of  
10 the six groups will have approximately 6-12 participants which is an acceptable  
11 number in qualitative research.

12 -Insert Figure 1 about here-

13 Figure 1. The six groups of participants.

## 14 **Procedure**

15 The study will use a *maximum variation sampling* approach of purposefully  
16 selecting a wide range of cases to document diversity and common patterns on  
17 dimensions of interest.<sup>35</sup> The research team will contact the program decision makers  
18 and program team members by phone to invite them to participate in the study. The  
19 program coordinators will contact the parents and referring MHP via a formal letter  
20 explaining the study and including an informed consent form. Only those who provide  
21 their written informed consent will be contacted by the research team to schedule an  
22 interview. The MHP will be interviewed at their workplace or via the phone, at a  
23 convenient time for them. The parents and adolescents will be interviewed at their  
24 community center or homes, at a time of their convenience. The researchers will also

1 attend the meetings of the program's inter-ministerial steering committee (participants  
2 in group 1 above) to document their perspectives and interactions.

### 3 **Data Collection**

4 **Semi-structured in-depth interviews.** Adolescents and their parents will be  
5 invited to participate in individual interviews, to better understand their subjective  
6 experiences.<sup>37</sup> Examples of questions for the adolescents in the program and their  
7 parents include: What do you want to get from the program? What should be  
8 maintained or strengthened in the program? What do you think should change in the  
9 program? What benefits have you received from the program? Examples of questions  
10 for the adolescents who withdrew from the program are: How did you experience the  
11 program? What relationship would you have liked to have with the coordinator of the  
12 program? What made you leave the program, what could have helped you stay?

13 The referring MHP will be interviewed to describe and evaluate recruitment  
14 processes and contacts with the program team in terms of continuity of care. For  
15 example: What are the characteristics of the adolescents you refer to the program?  
16 Describe the process of referring adolescents to the program: How is it conducted,  
17 what factors help you decide, what can be improved? Are you updated by the program  
18 team about the adolescents you referred to the program? And if so, how does this take  
19 place and for what length of time?

20 Members of the steering committee will be interviewed to assess the  
21 development and implementation of the program, for example: What difficulties,  
22 challenges and dilemmas did you encounter during the setting up and implementation  
23 of the program? What can be improved and how? What is missing from the program?  
24 The interviews will be conducted by the first author (HT) and will last approximately  
25 60-90 minutes.

1  
2  
3  
4 1 **Focus groups.** Each of the program teams (i.e., coordinators and volunteers)  
5  
6 2 will be invited to attend focus groups, to discuss their impressions of the training, the  
7  
8 3 program implementation, as well as their relationship with the participants  
9  
10 4 (adolescents and their parents) and with the referring MHP. The advantages of focus  
11  
12 5 groups are that each participant can express his/her opinion in a collaborative forum  
13  
14 6 that enables an exchange of different points of view, diverse interpretations, personal  
15  
16 7 and collective experiences, in an honest and open discussion, without fear of criticism  
17  
18 8 or censorship.<sup>38</sup> Examples of questions for the coordinators and volunteers are: What  
19  
20 9 preparation and training did you receive to work/volunteer in the program? What  
21  
22 10 difficulties, challenges and dilemmas have you encountered in the program? Describe  
23  
24 11 your role. Is your role clear to you? How would you describe your relationship with  
25  
26 12 the adolescents and their parents (nature, frequency, content)? To minimize social  
27  
28 13 desirability, individual interviews will also be conducted that may provide a deeper  
29  
30 14 understanding of each coordinator's personal experience. Focus groups will be  
31  
32 15 conducted by the first author (HT) and will last 90 minutes.  
33  
34  
35  
36

37 16 **Sociodemographic questionnaire.** Adolescents will answer sociodemographic  
38  
39 17 questions on their age, gender, country of birth, religion, length of time participating in  
40  
41 18 the program, and number of days a week participating in the program. The  
42  
43 19 sociodemographic questionnaire for parents will include questions about socioeconomic  
44  
45 20 status, marital status, their child's medical history and whether their child takes  
46  
47 21 psychiatric medication.  
48  
49  
50

## 51 22 **Data Analysis**

52  
53  
54 23 The qualitative data collected from the interviews and focus groups will be  
55  
56 24 recorded and transcribed. The primary emphasis of this study is on identifying  
57  
58 25 themes, commonalities, differences, and patterns across the participants. Meaning and  
59  
60

1 experience will be examined at both the semantic and latent levels, and best practices  
2 will be identified from the perspectives of the different stakeholders in the program.<sup>35</sup>  
3 <sup>36</sup> To this end, a 6-stage reflexive thematic analysis approach will be used, which is  
4 comprised of familiarization with and immersion in the data, coding of the data,  
5 constructing initial themes, reviewing themes, defining and naming themes, and  
6 writing up the report with illustrative data extracts.<sup>39</sup> This reflexive thematic analysis  
7 procedure will be used within the pragmatic and constructive frameworks. The  
8 checklist for good reflexive thematic analysis will be used as a guide to ensure an  
9 analysis that is rigorous and robust.<sup>40</sup> The data analysis procedure will be conducted  
10 by the first author (HT) and assessed by second author (HO); disagreements will be  
11 resolved by discussion. A qualitative data analysis software (ATLAS) will be used for  
12 data management and to assist data analysis.

13 To strengthen the validity of the findings, a triangulation procedure will be  
14 conducted with the qualitative data that will be collected by different methods  
15 (individual interviews and focus groups) and from different types of stakeholders in  
16 the program: the program's decision makers, team, intended beneficiaries, and  
17 referring MHP.<sup>36 41</sup>

### 18 **Study Trustworthiness**

19 To strengthen the trustworthiness of the findings in addition to the  
20 triangulation, three strategies will be employed, as suggested in the qualitative  
21 research literature.<sup>41</sup> Memo writing will be used to record decision-making, the  
22 process of meaning extraction from the data and subsequent conceptual development,  
23 as well as to facilitate continuous communication within the research team.<sup>42</sup> A  
24 reflexivity journal will be used to gain and maintain self-awareness of the researcher's  
25 perspective and its potential impact on the research process and interpretation of the

1 findings.<sup>41</sup> To increase the credibility of the research, member checking will be held  
2 (also known as participation validation). In this procedure, the findings will be  
3 presented to the participants who will be asked to respond whether they reflect their  
4 experience, meanings, and perspectives.<sup>41 43</sup> Finally, to enhance the rigor of the study  
5 the 32-item checklist for interviews and focus groups of the Consolidated Criteria for  
6 Reporting Qualitative research (COREQ; see online supplementary file) will be  
7 used.<sup>44</sup>

## 8 **Patient and Public Involvement**

9 Patients or the public are not involved in the project.

## 10 **Discussion**

11 Recovery-oriented adolescent-centered services in the community are crucial  
12 in the critical developmental period of adolescence, which might be even more  
13 complex for adolescents with MHC and might lead to difficulties in identity  
14 formation.<sup>2</sup> To date, adolescents with MHC in Israel are not eligible for community-  
15 based psychosocial rehabilitation services by law, despite the rising need. There is no  
16 centralized database with data on service consumers that is accessible by the three  
17 ministries that provide services for adolescents with MHC in Israel, which may result  
18 in inconsistent continuity of care. Coordination between different services is crucial  
19 for adolescents with MHC who go through multiple service transitions and are  
20 therefore more vulnerable to the risks of discontinuity.<sup>16 30 32 33 45 46</sup>

21 No study has examined a similar community-based psychosocial rehabilitation  
22 program for adolescents with MHC in Israel. This study of the *Amitim for Youth*  
23 program will enable a better understanding of the barriers and facilitators related to  
24 the infrastructure, implementation, and continuity of care of these services in Israel.  
25 The implementation of this type of program can be challenging because of its

1 pioneering nature and its target population: adolescents who do not only face age-  
2 related challenges but also have MHC. Thus, recruiting adolescents with MHC to  
3 participate in this research might be challenging given their psychiatric condition.  
4 Some adolescents might be reluctant to participate out of self-stigma or low  
5 motivation whereas others might be eager to participate to share their experiences and  
6 express their voice. The findings will provide best practices recommendations to  
7 optimize the operation and implementation by service providers, enhance the service  
8 contribution to the consumers (adolescents and their parents) while meeting their  
9 needs and goals, and inform policy makers. Specific attention will be paid to  
10 addressing the potential barriers and facilitators for effective program implementation.  
11 The findings may ultimately serve as a basis for currently under-developed policy  
12 recommendations and legislation in the field of adolescent psychiatric rehabilitation.

### 13 **Ethics and dissemination**

14 The study in its current design was approved by the Ethics Committee for  
15 Human Research in the Faculty of Social Welfare and Health Sciences at the  
16 University of Haifa (#455-18), and by the Chief Scientist in the Ministry of Education  
17 (#10566). Informed consent will be obtained from all participants and they will be  
18 guaranteed confidentiality and anonymity. Consent for the adolescents' participation  
19 will be also obtained from their parents or guardians via written consent. Data  
20 collection will be conducted in the next two years (2019-2020). A report in Hebrew  
21 will be submitted to the National Insurance Institute. The results will be disseminated  
22 in articles that will be written in English as part of a doctoral dissertation.

23 **Authors' contributions:** Both authors contributed equally to the conceptualization  
24 and design of the study. HT (MA, PhD candidate, cognitive behavioral drama

1 therapist, female) conducted the literature review that was examined and approved by  
2  
3  
4  
5  
6  
7  
8  
9  
10  
11  
12  
13  
14  
15  
16  
17  
18  
19  
20  
21  
22  
23  
24  
25  
26  
27  
28  
29  
30  
31  
32  
33  
34  
35  
36  
37  
38  
39  
40  
41  
42  
43  
44  
45  
46  
47  
48  
49  
50  
51  
52  
53  
54  
55  
56  
57  
58  
59  
60

1 therapist, female) conducted the literature review that was examined and approved by  
2 HO (PhD, researcher, male). Both authors read and approved the final manuscript.

3 **Funding:** The study is funded by the Israeli National Insurance Institute (grant#  
4 16343).

5 **Competing interests:** The authors declare that they have no competing interests. The  
6 funding body will have no role in data collection, analysis, interpretation, or  
7 publications.

8 **Consent for publication:** Not applicable.

9 **Word count:** 3646

## References

1. Orkibi H, Ronen T. A dual-pathway model linking self-control skills to aggression in adolescents: Happiness and time perspective as mediators. *Journal of Happiness Studies* 2019;20(3):729-42. doi: 10.1007/s10902-018-9967-1
2. Steinberg LD. *Adolescence*. 11th ed. New York, NY: McGraw-Hill 2017.
3. Erikson EH. *Identity: Youth and crisis*. New York, NY: W. W. Norton 1968.
4. Dwivedi K, Harper P. *Promoting emotional well-being of children and adolescents and preventing their mental ill health a handbook*. London, UK: Jessica Kingsley 2004.
5. Corrigan PW, Watson AC. The paradox of self-stigma and mental illness. *Clinical Psychology: Science and Practice* 2002;9(1):35-53. doi: 10.1093/clipsy.9.1.35
6. Martínez-Hidalgo MN, Lorenzo-Sánchez E, García JLL, et al. Social contact as a strategy for self-stigma reduction in young adults and adolescents with mental health problems. *Psychiatry Research* 2018;260:443-50. doi: <https://doi.org/10.1016/j.psychres.2017.12.017>
7. Mulfinger N, Müller S, Böge I, et al. Honest, open, proud for adolescents with mental illness: Pilot randomized controlled trial. *Journal of Child Psychology and Psychiatry* 2018;59(6):684-91. doi: <https://doi.org/10.1111/jcpp.12853>
8. Kaushik A, Kostaki E, Kyriakopoulos M. The stigma of mental illness in children and adolescents: A systematic review. *Psychiatry Research* 2016;243:469-94. doi: <https://doi.org/10.1016/j.psychres.2016.04.042>
9. Rose AL, Atkey SK, Goldberg JO. Self-stigma in youth: Prevention, intervention, and the relevance for schools. In: Leschied AW, Saklofske DH, Flett GL, eds. *Handbook of school-based mental health promotion: An evidence-informed framework for implementation*. Cham, Switzerland: Springer 2018:213-35.



- 1  
2  
3 10. Leschied AW, Saklofske DH, Flett GL. Handbook of school-based mental health  
4  
5 promotion: An evidence-informed framework for implementation. Cham,  
6  
7 Switzerland: Springer 2018.  
8  
9  
10 11. Hartman LI, Michel NM, Winter A, et al. Self-stigma of mental illness in high  
11  
12 school youth. *Canadian Journal of School Psychology* 2013;28(1):28-42. doi:  
13  
14 10.1177/0829573512468846  
15  
16  
17 12. Kranke D, Floersch J, Townsend L, et al. Stigma experience among adolescents  
18  
19 taking psychiatric medication. *Children and Youth Services Review*  
20  
21 2010;32(4):496-505. doi: <https://doi.org/10.1016/j.childyouth.2009.11.002>  
22  
23  
24 13. Moses T. Coping strategies and self-stigma among adolescents discharged from  
25  
26 psychiatric hospitalization: A 6-month follow-up study. *International Journal*  
27  
28 *of Social Psychiatry* 2015;61(2):188-97. doi: 10.1177/0020764014540146  
29  
30  
31 14. Mulfinger N, Rüsç N, Bayha P, et al. Secrecy versus disclosure of mental illness  
32  
33 among adolescents: I. The perspective of adolescents with mental illness.  
34  
35 *Journal of Mental Health* 2019;28(3):296-303. doi:  
36  
37 10.1080/09638237.2018.1487535  
38  
39  
40 15. Mulfinger N, Rüsç N, Bayha P, et al. Secrecy versus disclosure of mental illness  
41  
42 among adolescents: II. The perspective of relevant stakeholders. *Journal of*  
43  
44 *Mental Health* 2019;28(3):304-11. doi: 10.1080/09638237.2018.1487537  
45  
46  
47 16. Polanczyk GV, Salum GA, Sugaya LS, et al. Annual research review: A meta-  
48  
49 analysis of the worldwide prevalence of mental disorders in children and  
50  
51 adolescents. *The Journal of Child Psychology and Psychiatry* 2015;56(3):345-  
52  
53 65. doi: <https://doi.org/10.1111/jcpp.12381> [published Online First:  
54  
55 2015/02/05]  
56  
57  
58  
59  
60

- 1  
2  
3 17. Israel National Council for the Child. Israel national council for the child,  
4  
5 statistical abstract "children in Israel 2017" 2017 [Data Collection]. Available  
6  
7 from: <https://www.children.org.il/>  
8  
9
- 10 18. The Knesset. Proposed Rights and Services for Children and Youth with Mental  
11  
12 Disorders Law, 5766 - 2016. (P / 2783/20) 2019 [Available from:  
13  
14 [http://fs.knesset.gov.il//20/law/20\\_lst\\_323138.docx](http://fs.knesset.gov.il//20/law/20_lst_323138.docx).  
15  
16
- 17 19. UN High Commissioner for Human Rights. Mental health and human rights:  
18  
19 report of the United Nations High Commissioner for Human Rights 2017  
20  
21 [Available from: <https://digitallibrary.un.org/record/861008>.  
22  
23
- 24 20. Rabinowitz M. Children in israel: Selected issues regarding rights, needs and  
25  
26 services. Israel: The Committee on the Rights of the Child, 20th Knesset. 2015  
27  
28
- 29 21. Joyce AS, Wild TC, Adair CE, et al. Continuity of care in mental health services:  
30  
31 Toward clarifying the construct. *The Canadian Journal of Psychiatry*  
32  
33 2004;49(8):539-50. doi: 10.1177/070674370404900805 [published Online  
34  
35 First: 2004/09/30]  
36  
37
- 38 22. Anthony WA. Recovery from mental illness: The guiding vision of the mental  
39  
40 health service system in the 1990s. *Psychosocial Rehabilitation Journal*  
41  
42 1993;16(4):11-23. doi: 10.1037/h0095655  
43  
44
- 45 23. Davidson L. The recovery movement: Implications for mental health care and  
46  
47 enabling people to participate fully in life. *Health Aff (Millwood)*  
48  
49 2016;35(6):1091-7. doi: 10.1377/hlthaff.2016.0153 [published Online First:  
50  
51 2016/06/09]  
52  
53
- 54 24. Schrank B, Slade M. Recovery in psychiatry. *Psychiatric Bulletin*  
55  
56 2018;31(09):321-25. doi: 10.1192/pb.bp.106.013425 [published Online First:  
57  
58 2018/01/02]  
59  
60

- 1  
2  
3 1 25. Slade M. Personal recovery and mental illness: A guide for mental health  
4  
5 2 professionals. Cambridge: Cambridge University Press 2009.  
6  
7  
8 3 26. Aviram U, Ginath Y, Roe D. Mental health reforms in europe: Israel's  
9  
10 4 rehabilitation in the community of persons with mental disabilities law:  
11  
12 5 Challenges and opportunities. *Psychiatric Services* 2012;63(2):110-12. doi:  
13  
14 6 10.1176/appi.ps.201100009 [published Online First: 2012/02/04]  
15  
16  
17 7 27. Hughes F, Hebel L, Badcock P, et al. Ten guiding principles for youth mental  
18  
19 8 health services. *Early Intervention in Psychiatry* 2018;12(3):513-19. doi:  
20  
21 9 10.1111/eip.12429 [published Online First: 2017/04/13]  
22  
23  
24 10 28. McMahon J, Ryan F, Cannon M, et al. Where next for youth mental health  
25  
26 11 services in Ireland? *Irish Journal of Psychological Medicine* 2018:1-5.  
27  
28 12 Advance online publication. doi: <https://doi.org/10.1017/ipm.2018.12>  
29  
30  
31 13 29. Rickwood D, Paraskakis M, Quin D, et al. Australia's innovation in youth mental  
32  
33 14 health care: The headspace centre model. *Early intervention in psychiatry*  
34  
35 15 2019;13(1):159-66. doi: <https://doi.org/10.1111/eip.12740>  
36  
37  
38 16 30. Patel V, Flisher AJ, Hetrick S, et al. Mental health of young people: a global  
39  
40 17 public-health challenge. *The Lancet* 2007;369(9569):1302-13. doi:  
41  
42 18 [https://doi.org/10.1016/S0140-6736\(07\)60368-7](https://doi.org/10.1016/S0140-6736(07)60368-7)  
43  
44  
45 19 31. Kohrt B, Asher L, Bhardwaj A, et al. The role of communities in mental health  
46  
47 20 care in low-and middle-income countries: A meta-review of components and  
48  
49 21 competencies. *International Journal of Environmental Research Public Health*  
50  
51 22 2018;15(6):1-31. doi: 10.3390/ijerph15061279  
52  
53  
54 23 32. Malla A, Iyer S, Shah J, et al. Canadian response to need for transformation of  
55  
56 24 youth mental health services: ACCESS Open Minds (Esprits ouverts). *Early*  
57  
58  
59  
60

- 1  
2  
3  
4 1 *Intervention in Psychiatry* 2018 doi: 10.1111/eip.12772 [published Online  
5  
6 2 First: 2018/12/18]  
7  
8 3 33. Cleverley K, Rowland E, Bennett K, et al. Identifying core components and  
9  
10 4 indicators of successful transitions from child to adult mental health services:  
11  
12 5 A scoping review. *European Child & Adolescent Psychiatry* 2018:1-15.  
13  
14 6 Advance online publication. doi: <https://doi.org/10.1007/s00787-018-1213-1>  
15  
16  
17 7 34. Mertens DM, Wilson AT. Program evaluation theory and practice. 2nd ed. New  
18  
19 8 York, NY: Guilford Press 2018.  
20  
21 9 35. Patton MQ. Qualitative research & evaluation methods: Integrating theory and  
22  
23 10 practice. 4th ed. Thousand Oaks, CA: SAGE 2015.  
24  
25  
26 11 36. Creswell JW, Clark VLP. Designing and conducting mixed methods research. 3th  
27  
28 12 ed. Los angeles, CA: Sage 2017.  
29  
30  
31 13 37. Kvale S, Brinkmann S. Interviews: Learning the craft of qualitative research  
32  
33 14 interviewing. Thousand Oaks, CA: Sage 2009.  
34  
35  
36 15 38. Bloor M. Focus groups in social research. Thousand Oaks, CA: SAGE 2001.  
37  
38 16 39. Braun V, Clarke V, Hayfield N, et al. Thematic analysis. In: Liamputtong P, ed.  
39  
40 17 Handbook of research methods in health social sciences. Singapore: Springer  
41  
42 18 Singapore 2019:843-60.  
43  
44  
45 19 40. Terry G, Hayfield N, Clarke V, et al. Thematic analysis. In: Willig C, Rogers WS,  
46  
47 20 eds. The SAGE handbook of qualitative research in psychology. London, UK:  
48  
49 21 SAGE 2017:17-37.  
50  
51  
52 22 41. Shenton AK. Strategies for ensuring trustworthiness in qualitative research  
53  
54 23 projects. *Education for Information* 2004;22(2):63-75. doi: 10.3233/EFI-2004-  
55  
56 24 22201  
57  
58  
59  
60

- 1  
2  
3 1 42. Birks M, Chapman Y, Francis K. Memoing in qualitative research: Probing data  
4  
5 2 and processes. *Journal of Research in Nursing* 2008;13(1):68-75. doi:  
6  
7 3 10.1177/1744987107081254  
8  
9  
10 4 43. Foster A. A nonlinear model of information-seeking behavior. *Journal of the*  
11  
12 5 *American Society for Information Science and Technology* 2004;55(3):228-37.  
13  
14 6 doi: 10.1002/asi.10359  
15  
16  
17 7 44. Tong A, Sainsbury P, Craig J. Consolidated criteria for reporting qualitative  
18  
19 8 research (COREQ): a 32-item checklist for interviews and focus groups. *Int J*  
20  
21 9 *Qual Health Care* 2007;19(6):349-57. doi: 10.1093/intqhc/mzm042 [published  
22  
23 10 Online First: 2007/09/18]  
24  
25  
26 11 45. Tobon JI, Reid GJ, Brown JB. Continuity of care in children's mental health:  
27  
28 12 parent, youth and provider perspectives. *Community Mental Health Journal*  
29  
30 13 2015;51(8):921-30. doi: <https://doi.org/10.1007/s10597-015-9873-5>  
31  
32  
33 14 46. Paul M, Street C, Wheeler N, et al. Transition to adult services for young people  
34  
35 15 with mental health needs: A systematic review. *Clinical Child Psychology and*  
36  
37 16 *Psychiatry* 2015;20(3):436-57. doi:  
38  
39 17 <https://doi.org/10.1177/1359104514526603>  
40  
41  
42  
43 18  
44  
45  
46 19  
47  
48  
49 20  
50  
51  
52  
53  
54  
55  
56  
57  
58  
59  
60

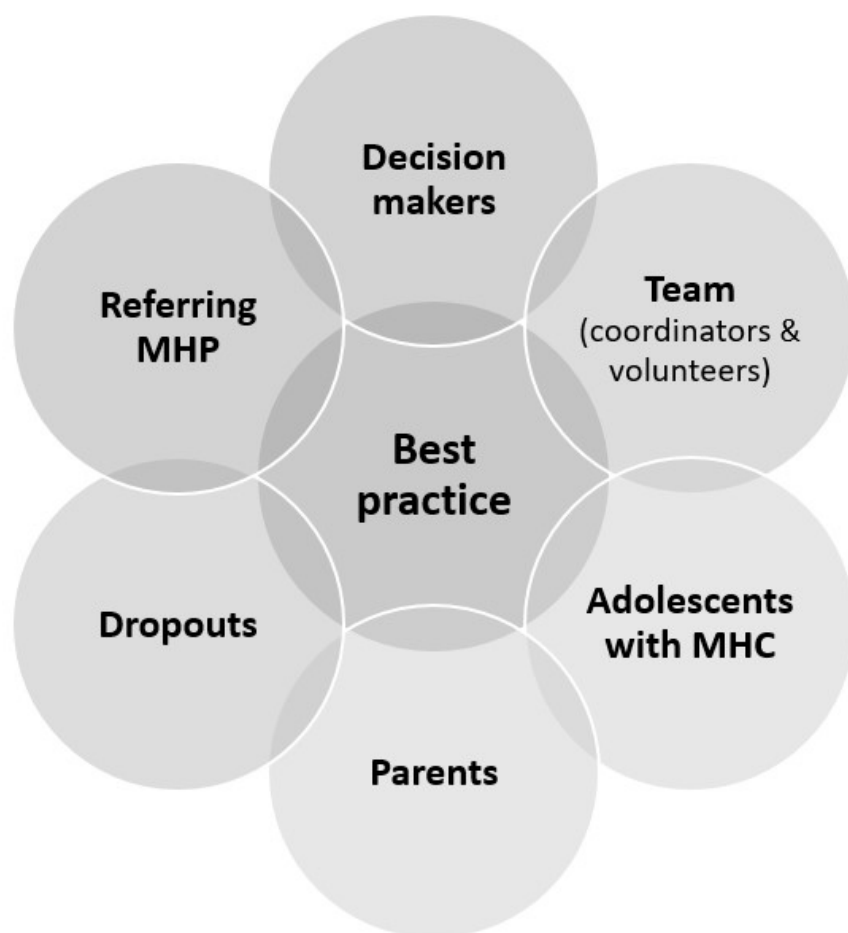

Figure 1. Six groups of participants in the study.

166x163mm (96 x 96 DPI)

## COREQ- Consolidated criteria for reporting qualitative research: a 32-item checklist for interviews and focus groups

Tuaf, H. & Orkibi, H. (2019). A community-based rehabilitation program for adolescents with mental health conditions: A qualitative study protocol.

| Section/Topic                                  | Item # | Checklist item                                                                                                                                           | Reported on page # |
|------------------------------------------------|--------|----------------------------------------------------------------------------------------------------------------------------------------------------------|--------------------|
| <b>Domain 1: Research team and reflexivity</b> |        |                                                                                                                                                          |                    |
| <b>Personal characteristics</b>                |        |                                                                                                                                                          |                    |
| Interviewer/facilitator                        | 1      | Which author/s conducted the interview or focus group?                                                                                                   | 12,13              |
| Credentials                                    | 2      | What were the researcher's credentials? E.g. PhD, MD                                                                                                     | 17                 |
| Occupation                                     | 3      | What was their occupation at the time of the study?                                                                                                      | 17                 |
| Gender                                         | 4      | Was the researcher male or female?                                                                                                                       | 17                 |
| Experience and training                        | 5      | What experience or training did the researcher have?                                                                                                     | 17                 |
| <b>Relationship with participants</b>          |        |                                                                                                                                                          |                    |
| Relationship established                       | 6      | Was a relationship established prior to study commencement?                                                                                              | 11-12              |
| Participant knowledge of the interviewer       | 7      | What did the participants know about the researcher? e.g. personal goals, reasons for doing the research                                                 | 17                 |
| Interviewer characteristics                    | 8      | What characteristics were reported about the interviewer/facilitator? e.g. Bias, assumptions, reasons and interests in the research topic                | 17                 |
| <b>Domain 2: Study design</b>                  |        |                                                                                                                                                          |                    |
| <b>Theoretical framework</b>                   |        |                                                                                                                                                          |                    |
| Methodological orientation and Theory          | 9      | What methodological orientation was stated to underpin the study? e.g. grounded theory, discourse analysis, ethnography, phenomenology, content analysis | 10                 |
| <b>Participant selection</b>                   |        |                                                                                                                                                          |                    |
| Sampling                                       | 10     | How were participants selected? e.g. purposive, convenience, consecutive, snowball                                                                       | 11                 |
| Method of approach                             | 11     | How were participants approached? e.g. face-to-face, telephone, mail, email                                                                              | 11-12              |
| Sample size                                    | 12     | How many participants were in the study?                                                                                                                 | N/A                |
| Non-participation                              | 13     | How many people refused to participate or dropped out? Reasons?                                                                                          | N/A                |
| Setting of data collection                     | 14     | Where was the data collected? e.g. home, clinic, workplace                                                                                               | 11-12              |
| Presence of non-participants                   | 15     | Was anyone else present besides the participants and researchers?                                                                                        | 13                 |
| Description of sample                          | 16     | What are the important characteristics of the sample? e.g. demographic data, date                                                                        | 13                 |
| <b>Data collection</b>                         |        |                                                                                                                                                          |                    |
| Interview guide                                | 17     | Were questions, prompts, guides provided by the authors? Was it pilot tested?                                                                            | 12-13              |
| Repeat interviews                              | 18     | Were repeat interviews carried out? If yes, how many?                                                                                                    | N/A                |
| Audio/visual recording                         | 19     | Did the research use audio or visual recording to collect the data?                                                                                      | 13                 |
| Field notes                                    | 20     | Were field notes made during and/or after the interview or focus group?                                                                                  | 14                 |
| Duration                                       | 21     | What was the duration of the interviews or focus group?                                                                                                  | 12-13              |
| Data saturation                                | 22     | Was data saturation discussed?                                                                                                                           | 11                 |

## COREQ- Consolidated criteria for reporting qualitative research: a 32-item checklist for interviews and focus groups

| Section/Topic                          | Item # | Checklist item                                                                                                                    | Reported on page # |
|----------------------------------------|--------|-----------------------------------------------------------------------------------------------------------------------------------|--------------------|
| Transcripts returned                   | 23     | Were transcripts returned to participants for comment and/or correction?                                                          | N/A                |
| <b>Domain 3: Analysis and findings</b> |        |                                                                                                                                   |                    |
| <b>Data analysis</b>                   |        |                                                                                                                                   |                    |
| Number of data coders                  | 24     | How many data coders coded the data?                                                                                              | 14                 |
| Description of the coding tree         | 25     | Did authors provide a description of the coding tree?                                                                             | N/A                |
| Derivation of themes                   | 26     | Were themes identified in advance or derived from the data?                                                                       | 14                 |
| Software                               | 27     | What software, if applicable, was used to manage the data?                                                                        | 14                 |
| Participant checking                   | 28     | Did participants provide feedback on the findings?                                                                                | 14-15              |
| <b>Reporting</b>                       |        |                                                                                                                                   |                    |
| Quotations presented                   | 29     | Were participant quotations presented to illustrate the themes / findings? Was each quotation identified? e.g. participant number | N/A                |
| Data and findings consistent           | 30     | Was there consistency between the data presented and the findings?                                                                | N/A                |
| Clarity of major themes                | 31     | Were major themes clearly presented in the findings?                                                                              | N/A                |
| Clarity of minor themes                | 32     | Is there a description of diverse cases or discussion of minor themes?                                                            | N/A                |

**Note:** The checklist consists of items that should be included in reports on a qualitative study that has been completed. N/A = item not applicable to the current protocol of a study in the participant recruitment phase. Page numbers are for the document submitted for review.

### Checklist reference:

Tong A, Sainsbury P, Craig J. Consolidated criteria for reporting qualitative research (COREQ): a 32-item checklist for interviews and focus groups. *International Journal for Quality in Health Care*. 2007; 19(6): 349-357.
