# Supplementary material for: Community-based rehabilitation programme for adolescents with mental health conditions in Israel: a qualitative study protocol
Source: PubMed Central journal article supplement — BMJ Open. 2019 Dec 18;9(12):e032809. doi: 10.1136/bmjopen-2019-032809 (PMC6937008; doi:10.1136/bmjopen-2019-032809), 2019-12-18
Supplement: bmjopen-2019-032809supp001.pdf [file bmjopen-2019-032809supp001.pdf]

## COREQ- Consolidated criteria for reporting qualitative research: a 32-item checklist for interviews and focus groups

Tuaf, H. & Orkibi, H. (2019). A community-based rehabilitation program for adolescents with mental health conditions: A qualitative study protocol.

| Section/Topic                                  | Item # | Checklist item                                                                                                                                           | Reported on page # |
|------------------------------------------------|--------|----------------------------------------------------------------------------------------------------------------------------------------------------------|--------------------|
| <b>Domain 1: Research team and reflexivity</b> |        |                                                                                                                                                          |                    |
| <b>Personal characteristics</b>                |        |                                                                                                                                                          |                    |
| Interviewer/facilitator                        | 1      | Which author/s conducted the interview or focus group?                                                                                                   | 12,13              |
| Credentials                                    | 2      | What were the researcher's credentials? E.g. PhD, MD                                                                                                     | 17                 |
| Occupation                                     | 3      | What was their occupation at the time of the study?                                                                                                      | 17                 |
| Gender                                         | 4      | Was the researcher male or female?                                                                                                                       | 17                 |
| Experience and training                        | 5      | What experience or training did the researcher have?                                                                                                     | 17                 |
| <b>Relationship with participants</b>          |        |                                                                                                                                                          |                    |
| Relationship established                       | 6      | Was a relationship established prior to study commencement?                                                                                              | 11-12              |
| Participant knowledge of the interviewer       | 7      | What did the participants know about the researcher? e.g. personal goals, reasons for doing the research                                                 | 17                 |
| Interviewer characteristics                    | 8      | What characteristics were reported about the interviewer/facilitator? e.g. Bias, assumptions, reasons and interests in the research topic                | 17                 |
| <b>Domain 2: Study design</b>                  |        |                                                                                                                                                          |                    |
| <b>Theoretical framework</b>                   |        |                                                                                                                                                          |                    |
| Methodological orientation and Theory          | 9      | What methodological orientation was stated to underpin the study? e.g. grounded theory, discourse analysis, ethnography, phenomenology, content analysis | 10                 |
| <b>Participant selection</b>                   |        |                                                                                                                                                          |                    |
| Sampling                                       | 10     | How were participants selected? e.g. purposive, convenience, consecutive, snowball                                                                       | 11                 |
| Method of approach                             | 11     | How were participants approached? e.g. face-to-face, telephone, mail, email                                                                              | 11-12              |
| Sample size                                    | 12     | How many participants were in the study?                                                                                                                 | N/A                |
| Non-participation                              | 13     | How many people refused to participate or dropped out? Reasons?                                                                                          | N/A                |
| Setting of data collection                     | 14     | Where was the data collected? e.g. home, clinic, workplace                                                                                               | 11-12              |
| Presence of non-participants                   | 15     | Was anyone else present besides the participants and researchers?                                                                                        | 13                 |
| Description of sample                          | 16     | What are the important characteristics of the sample? e.g. demographic data, date                                                                        | 13                 |
| <b>Data collection</b>                         |        |                                                                                                                                                          |                    |
| Interview guide                                | 17     | Were questions, prompts, guides provided by the authors? Was it pilot tested?                                                                            | 12-13              |
| Repeat interviews                              | 18     | Were repeat interviews carried out? If yes, how many?                                                                                                    | N/A                |
| Audio/visual recording                         | 19     | Did the research use audio or visual recording to collect the data?                                                                                      | 13                 |
| Field notes                                    | 20     | Were field notes made during and/or after the interview or focus group?                                                                                  | 14                 |
| Duration                                       | 21     | What was the duration of the interviews or focus group?                                                                                                  | 12-13              |
| Data saturation                                | 22     | Was data saturation discussed?                                                                                                                           | 11                 |

**COREQ- Consolidated criteria for reporting qualitative research: a 32-item checklist for interviews and focus groups**

| Section/Topic                          | Item # | Checklist item                                                                                                                    | Reported on page # |
|----------------------------------------|--------|-----------------------------------------------------------------------------------------------------------------------------------|--------------------|
| Transcripts returned                   | 23     | Were transcripts returned to participants for comment and/or correction?                                                          | N/A                |
| <b>Domain 3: Analysis and findings</b> |        |                                                                                                                                   |                    |
| <b>Data analysis</b>                   |        |                                                                                                                                   |                    |
| Number of data coders                  | 24     | How many data coders coded the data?                                                                                              | 14                 |
| Description of the coding tree         | 25     | Did authors provide a description of the coding tree?                                                                             | N/A                |
| Derivation of themes                   | 26     | Were themes identified in advance or derived from the data?                                                                       | 14                 |
| Software                               | 27     | What software, if applicable, was used to manage the data?                                                                        | 14                 |
| Participant checking                   | 28     | Did participants provide feedback on the findings?                                                                                | 14-15              |
| <b>Reporting</b>                       |        |                                                                                                                                   |                    |
| Quotations presented                   | 29     | Were participant quotations presented to illustrate the themes / findings? Was each quotation identified? e.g. participant number | N/A                |
| Data and findings consistent           | 30     | Was there consistency between the data presented and the findings?                                                                | N/A                |
| Clarity of major themes                | 31     | Were major themes clearly presented in the findings?                                                                              | N/A                |
| Clarity of minor themes                | 32     | Is there a description of diverse cases or discussion of minor themes?                                                            | N/A                |

**Note:** The checklist consists of items that should be included in reports on a qualitative study that has been completed. N/A = item not applicable to the current protocol of a study in the participant recruitment phase. Page numbers are for the document submitted for review.

**Checklist reference:**

Tong A, Sainsbury P, Craig J. Consolidated criteria for reporting qualitative research (COREQ): a 32-item checklist for interviews and focus groups. *International Journal for Quality in Health Care*. 2007; 19(6): 349-357.
